# Supplementary material for: Readiness of public health facilities to provide quality maternal and newborn care across the state of Bihar, India: a cross-sectional study of district hospitals and primary health centres
Source: PubMed Central journal article supplement (PMC6678016; doi:10.1136/bmjopen-2018-028370), 2019-07-29
Supplement: bmjopen-2018-028370.draft_revisions.pdf [file bmjopen-2018-028370.draft_revisions.pdf]

# BMJ Open

BMJ Open is committed to open peer review. As part of this commitment we make the peer review history of every article we publish publicly available.

When an article is published we post the peer reviewers' comments and the authors' responses online. We also post the versions of the paper that were used during peer review. These are the versions that the peer review comments apply to.

The versions of the paper that follow are the versions that were submitted during the peer review process. They are not the versions of record or the final published versions. They should not be cited or distributed as the published version of this manuscript.

BMJ Open is an open access journal and the full, final, typeset and author-corrected version of record of the manuscript is available on our site with no access controls, subscription charges or pay-per-view fees (<http://bmjopen.bmj.com>).

If you have any questions on BMJ Open's open peer review process please email [info.bmjopen@bmj.com](mailto:info.bmjopen@bmj.com)

# BMJ Open

**Readiness of public health facilities to provide quality maternal and newborn care across the state of Bihar, India: a cross-sectional study of district hospitals and primary health centres**

|                               |                                                                                                                                                                                                                                                                                                                                                       |
|-------------------------------|-------------------------------------------------------------------------------------------------------------------------------------------------------------------------------------------------------------------------------------------------------------------------------------------------------------------------------------------------------|
| Journal:                      | <i>BMJ Open</i>                                                                                                                                                                                                                                                                                                                                       |
| Manuscript ID                 | bmjopen-2018-028370                                                                                                                                                                                                                                                                                                                                   |
| Article Type:                 | Research                                                                                                                                                                                                                                                                                                                                              |
| Date Submitted by the Author: | 10-Dec-2018                                                                                                                                                                                                                                                                                                                                           |
| Complete List of Authors:     | kaur, Japneet; Oxford Policy Management, Franzen, Samuel; Oxford Policy Management, ; University of Oxford, Centre for Tropical Medicine and Global Health Newton-Lewis, Tom; Oxford Policy Management Murphy, Georgina ; Kenya Medical Research Institute/Wellcome Trust Research Programme, Health Services Unit; Bill and Melinda Gates Foundation |
| Keywords:                     | Health & safety < HEALTH SERVICES ADMINISTRATION & MANAGEMENT, Health economics < HEALTH SERVICES ADMINISTRATION & MANAGEMENT, Health policy < HEALTH SERVICES ADMINISTRATION & MANAGEMENT, Quality in health care < HEALTH SERVICES ADMINISTRATION & MANAGEMENT                                                                                      |
|                               |                                                                                                                                                                                                                                                                                                                                                       |

SCHOLARONE™  
Manuscripts

1  
2  
3  
4  
5 **Full Title:** Readiness of public health facilities to provide quality maternal and newborn care  
6 across the state of Bihar, India: a cross-sectional study of district hospitals and primary health  
7 centres  
8

9 **Short title:** Readiness of health facilities to provide quality maternal and newborn care in Bihar,  
10 India  
11

12 **Authors:** Japneet Kaur\* <sup>1</sup>, Sam Frazen<sup>2</sup>, Tom Newton-Lewis<sup>1</sup>, Georgina A. V. Murphy<sup>1,3</sup>  
13

14 **Affiliations:**  
15

16 1. Oxford Policy Management(OPM), Delhi, India  
17

18 2. Oxford Policy Management(OPM), Oxford, UK  
19

20 3. Centre for Tropical Medicine and Global Health, University of Oxford, UK  
21

22 **\*Corresponding author:** Japneet Kaur, Oxford Policy Management, 4/6 First Floor, Siri Fort  
23 Institutional Area, New Delhi, India Email: japneetkaur58@gmail.com. Tel: (+91) 011-48081111  
24

25 **Key words:** neonatal care, maternal care, newborn, infrastructure, newborn mortality, maternal  
26 mortality, district hospital, primary health care, audit, staffing, quality of care, Bihar, India  
27

28 **Abstract (max 300 words)**  
29

30 Introduction: Poor access to quality healthcare is one of the most important reasons of high  
31 maternal and neonatal mortality in India, particularly in poorer states like Bihar. India has  
32 implemented initiatives to promote institutional maternal deliveries. It is important to ensure that  
33 health facilities are adequately equipped and staffed to provide quality care for mothers and  
34 newborns.  
35

36 Methods: We conducted a cross-sectional study of 190 primary health centres (PHCs) and 36  
37 district hospitals (DHs) across all districts in Bihar to assess the readiness of facilities to provide  
38 quality maternal and neonatal care. Infrastructure, equipment and supplies, and staffing were  
39 assessed using the WHO service availability and readiness assessment and Indian public health  
40 standard (IPHS) guidelines. Additionally, we used household survey data to assess the quality of  
41 care reported by mothers delivering at study facilities.  
42

43 Results: PHCs and DHs were found to have 61% and 67% of the mandated structural components  
44 to provide maternal and neonatal care, on average, respectively. DHs were, on average, slightly  
45 better equipped in terms of infrastructure, equipment and supplies by comparison to PHCs. DHs  
46 were found to be inadequately prepared to provide neonatal care. Lack of recommended  
47 handwashing stations and bins at both DHs and PHCs suggested low levels of hygiene. Only half  
48 of the essential drugs were available in both DHs and PHCs. While no association was revealed  
49 between structural capacity and patient-reported quality of care, adequacy of staffing was  
50 positively associated with the quality of care in DHs.  
51  
52

53 Conclusion: Examining all DHs and a representative sample of all PHCs in Bihar, this study  
54 revealed that improvement in service readiness is essential, to provide quality care to mothers  
55  
56  
57

1  
2  
3 and newborns. Access to quality care is essential if progress in reducing mortality is to be  
4 achieved in this populous high-burden state.  
5

### 6 **Strengths and limitations of this study**

- 7
- 8 • The findings of this study are based on data collected from a single visit to these facilities;  
9 the availability of different equipment and supplies might vary over time.
- 10 • There is incomplete data in some facilities. Therefore, the number of responses varied  
11 across and within the components of infrastructure, supplies, equipment and staffing.
- 12 • With respect to household data, women providing information on quality of care were not  
13 representative of those delivering at facilities and the sampling was not proportional to the  
14 number of deliveries at each facility  
15  
16  
17

### 18 **INTRODUCTION**

19  
20 Progress has been made in reducing maternal and newborn mortality in India over the last three  
21 decades. From 556 per 100,000 and 57 per 1,000 live births in 1990, the maternal and neonatal  
22 mortality in India reduced to 174 per 100,000 and 26 per 1,000 in 2015, respectively.[1] However,  
23 considerable further improvements will be needed if India is to reach the Sustainable  
24 Development Goal of reducing maternal mortality to less than 70 per 100,000 births and neonatal  
25 mortality to at least as low as 12 per 1,000 live births by 2030.[2]  
26  
27

28 These goals will be particularly challenging for Bihar, the third most populated state in India  
29 (approximately 104 million). Bihar struggles with persistent poverty (34% of the population lives  
30 below the poverty line) and poor health outcomes (neonatal mortality rate of 27 per 1,000 live  
31 births and maternal mortality rate of 208 per 100,000 live births).[3–5] Only 63% of the pregnant  
32 women deliver in a health facility in Bihar, which is 12% lower than the national average.[6,7] This  
33 is an important area that needs attention since the biggest gains in survival are estimated to be  
34 achieved through facility-based maternal care provided at the time of childbirth and the immediate  
35 postpartum period along with newborn care.[8]  
36  
37

38 In recognition of the importance of facility-based maternal and newborn care, India has  
39 implemented many initiatives to encourage institutional deliveries. The most ambitious of these is  
40 the Janani Suraksha Yojana (JSY) programme offering conditional cash transfers to women of  
41 low socio-economic status for delivering at a health facility.[9] Despite the success of JSY in  
42 increasing institutional deliveries, gaps in the readiness of facilities to provide quality care have  
43 been highlighted as an important barrier for the programme to have the intended effect on health  
44 outcomes.[10,11] It is crucial to ensure that facilities are adequately resourced and equipped to  
45 deliver essential maternal and newborn care.[12–15] At the minimum, health facilities require  
46 adequate infrastructure, equipment, supplies, and skilled staff if significant improvements in  
47 reducing mortality and morbidity are to be achieved.  
48  
49  
50

51 The public health system in India comprises of a three-tier system, namely, primary care at the  
52 village level, secondary care at the sub-district and district levels and tertiary levels of health care  
53 at the regional level. The district hospital (DH) is an essential medium of secondary level of health  
54 care with an objective to provide curative, preventive and promotive health care services to the  
55 people in the district. Linked to every DH are health centres providing primary care, including sub-  
56  
57

1  
2  
3 divisional hospitals, community health centres (CHCs), primary health centres (PHCs) and sub-  
4 centres. PHCs are crucial to the health system as they form the first point of contact to a qualified  
5 doctor of the public sector for the patients. There are two kinds of PHCs, one is called additional  
6 PHC which mainly does clinical work and the other is block PHC which also exercises  
7 administrative powers in the entire block. Serving a population between 20,000 and 30,000, PHCs  
8 act as a referral unit for six sub-centres and refer out cases to CHCs and higher order facilities.  
9 In Bihar, there are 36 DHs, 70 CHCs, 9729 sub-centres and 1883 PHCs (including 534 block  
10 PHCs).[16]  
11  
12

13 This study aims to assess structural and staffing gaps in the public health facilities, specifically,  
14 PHCs and DHs in Bihar, to deliver essential maternal and newborn services. This study is based  
15 on the data collected in the baseline assessment of Bihar Technical Support Programme (BTSP).  
16 BTSP is a large multi-year programme funded by the Bill and Melinda Gates Foundation and  
17 implemented by CARE India with OPM as monitoring and evaluation partner.[17] Working closely  
18 with Government of Bihar's Departments of Health and Family Welfare and Social Welfare, CARE  
19 India's interventions aim to strengthen the health system and improve the quality of care to  
20 improve reproductive, maternal, newborn, child, adolescent and nutrition (RMNCH+N) outcomes.  
21  
22  
23

## 24 **METHODS**

25  
26 We conducted a cross-sectional study of health facilities in Bihar during July-October 2016.  
27 Facility surveys were conducted in block (sub-district) and district level government-run public  
28 health facilities. This study also uses household maternal and child health survey data collected  
29 during October-December 2016 by CARE India.  
30

### 31 **Study population and sampling**

32  
33 There are 36 district hospitals in Bihar, all of which were invited to participate in the facility survey.  
34 There are 534 blocks (sub-districts) in Bihar, 190 of which were sampled for the facility survey.  
35 Blocks were sampled proportionally according to the total number of blocks per district, resulting  
36 in 5-6 blocks sampled per district. Each block contains one block PHC, all of which (from the 190  
37 sampled blocks) were included in the facility survey.  
38  
39

40 Household survey data were collected from mothers who had a child belonging to the following  
41 five age groups: i) 0-2; ii) 3-5; iii) 6-8; iv) 9-11; and v) 12-23 months old. A mixed sampling  
42 methodology of population based-estimation and lot quality assurance sampling (LQAS) (a small  
43 sample survey design based on binomial distribution) was used [18]. The sampling 'lots' in this  
44 survey were the blocks/sub-districts. All 534 blocks in 38 districts were sampled. The number of  
45 Anganwadi Centers (AWC, village level institutions providing basic health care services) sampled  
46 from each block was determined using proportional allocation. The sampled AWC were selected  
47 within each block using simple random sampling. Within each sampled AWC catchment area,  
48 households were identified through systematic sampling.[18] Briefly, an index household was  
49 chosen within each AWC catchment area using a random number table. Starting with the index  
50 household, data collectors visited every 10th household looking for eligible mothers. The data  
51 collectors continued moving in a circular manner, following the 'right-hand rule', until five  
52 interviews were conducted with eligible mothers (one from each age group). Only data collected  
53 from mothers with children aged between 0-2 months and who also delivered at the DHs or PHCs  
54  
55  
56  
57  
58  
59  
60

1  
2  
3 that were covered in the facility survey (ranging from 1 to 17 mother per facility) were included in  
4 this analysis.  
5

## 6 **Data collection**

### 7 **Facility survey**

8  
9  
10 Data were collected using a standardised structured survey tool designed based on the Service  
11 Availability and Readiness Assessment (SARA) tool developed by the World Health Organisation  
12 (WHO) and the United States Agency for International Development.[19] The tool was modified  
13 for the Indian context using the Indian Public Health Standards (IPHS) guidelines.[20,21] To  
14 evaluate the structural capacity of the facility, the availability and condition of infrastructure,  
15 equipment, and supplies in different departments, including the labour room, New Born Care  
16 Corner (NBCC), immunization room, laboratory, operation theatre, drug store, and data operation  
17 were assessed. Information on infrastructure and equipment was collected through interviews  
18 with the facility-in-charge and staff nurse as well as through direct observation. The pharmacist  
19 or drug store-in-charge was interviewed and the responses were validated through the drug  
20 register to collect information on supplies availability.  
21  
22  
23

24 The Medical Officer in Charge (MOIC) at the PHCs and Hospital Manager at the DHs were also  
25 interviewed to obtain information on the number of health personnel employed at the facilities and  
26 the number of personnel that were sanctioned (number of staff expected to be employed) to the  
27 facilities for each of the health cadres, including medical officers (MOs), staff nurses, auxiliary  
28 nurse midwifery (ANMs), laboratory technicians, and pharmacists. This information was also  
29 cross-checked with the facility registers.  
30  
31

32 Availability of 30 services related to family planning, safe delivery, antenatal care, and neonatal  
33 and child care was assessed and the reasons for unavailability were asked from the MOIC in  
34 PHCs and the Hospital Manager in DHs.  
35

36 Three pilot tests were conducted in the facilities outside the study sample to refine the survey tool  
37 and to train the enumeration team. The survey was conducted by 60 enumerators over the four  
38 month period. Enumerators all had prior experience in conducting facility surveys and received  
39 further training over 10 days on using the study tool and conducting this survey.  
40  
41

42 Periodic data checks for completeness and outliers were conducted by a data management team  
43 in Patna, Bihar. Where information was missing due to absenteeism or lack of time provided by  
44 the respondent, a second visit to those facilities was organized.  
45

### 46 **LQAS Household survey**

47  
48 One-to-one interviews were conducted with consenting and eligible mothers by trained data  
49 collectors, using a standardised questionnaire and following standard operating procedures.  
50 Information collected from mothers and of interest to this study included the household  
51 characteristics, the place of delivery, and care received at the place of delivery.  
52

### 53 **Patient and Public involvement**

1  
2  
3 Mothers with children belonging to the following five age groups: i) 0-2; ii) 3-5; iii) 6-8; iv) 9-11;  
4 and v) 12-23 months old were interviewed. Information with respect to the household  
5 characteristics, the place of delivery, and care received at the place of delivery was collected from  
6 the mothers to complement our findings of the readiness of the facilities to provide quality care.  
7  
8  
9

## 10 Data Analysis

11  
12 Data analysis was conducted using Stata version 13 (Stata Corporation, USA). The current status  
13 of the facilities was assessed on three broad parameters, namely, the structural capacity, staffing,  
14 and the quality of care provided at the facilities.  
15

### 16 Structural Capacity

17  
18 The structural capacity of the facilities was assessed by computing readiness scores of 0-1 for  
19 infrastructure, equipment and supplies using a set of questions included in our facility assessment  
20 tool. "Infrastructure readiness" included the availability as well as the condition of different  
21 components, wherever applicable. For equipment, "readiness" implied the availability as well as  
22 functionality of the equipment and for supplies, readiness was defined by availability.  
23  
24

25 Infrastructure readiness of the facilities included nine broad components (such as power, water,  
26 transport, handwashing stations) at the PHCs.[19] An additional three components (availability of  
27 different rooms, computer and internet, and blood bank) were assessed for DH infrastructure  
28 score (details of components are listed in **appendix table S1**).  
29

30  
31 The equipment readiness of the facilities was assessed by scoring the availability and functionality  
32 of 48 essential (according to IPHS guidelines) maternal and newborn health equipment (items  
33 listed in **appendix table S2**). A score of 1 was assigned if the equipment was observed to be  
34 available and in a functional state. In case of unavailability or available but not functional  
35 equipment, a score of 0 was assigned. Similarly, supplies readiness was assessed by considering  
36 the availability of 76 essential maternal and child health drugs that were expected at the facilities  
37 as per the IPHS guidelines (listed in **appendix table S3**). Detailed methods of scoring have been  
38 provided in **the appendix**.  
39  
40

### 41 Staffing Index

42  
43 We assessed the availability of human resources by computing the ratio of filled to sanctioned  
44 positions, as reported by the MOIC and the Hospital Manager or equivalent authority in charge in  
45 the PHCs and DHs, for each health cadre in each facility. The ratio of total filled to total sanctioned  
46 positions for permanent staff, combining all cadres, was computed to generate an overall staffing  
47 index for each facility.  
48  
49

50 The availability of health staff was also compared with the essential requirements mandated by  
51 IPHS guidelines. In PHCs, we considered staff requirement based on the monthly delivery load  
52 of more than 20, as provided by the IPHS guidelines.[20] In DHs, the staff requirement based on  
53 the bed strength were rounded down to compare with the mandated guidelines.[21] For instance,  
54 for DHs with less than or equal to 200 beds, we considered the staff requirements for 100 beds  
55  
56  
57

1  
2  
3 as defined by IPHS guidelines. For ANMs, the IPHS requirement of 0.45 staff per bed was  
4 considered. (**appendix table S4**).  
5  
6  
7

## 8 Quality of care 9

10 Our primary aim was to describe the structural readiness of facilities to provide essential maternal  
11 and new-born services. We also conducted analyses of household survey data to explore the  
12 quality of care at facilities as reported by women who both participated in the household survey  
13 and delivered at study facilities.  
14

15 Each mother was asked 11 questions during the household survey pertaining to the treatment  
16 and care that they and their newborns received during delivery. Each question was assigned a  
17 score of 0 (not performed/don't know) or 1 (performed). A quality of care index for each PHC and  
18 DH was generated by taking the average score of the 11 questions for all those household survey  
19 participants who delivered within the facility.  
20  
21

22 The relationship between structural capacity, staffing, and quality of care indexes were visually  
23 explored using scatter plots and trend lines as part of this exploratory analysis.  
24

## 25 Ethics and permission 26

27 Ethical approval was granted by the Indian Institutional Review Board. Oral consent to conduct  
28 this study was obtained from the MOIC and the Hospital Manager or equivalent authority in charge  
29 in the PHCs and DHs, respectively. For the household survey, ethics approval was obtained from  
30 Ashirwad Ethics Committee, Ashirwad Hospital and Research Center, Ulhasnagar, India.  
31  
32  
33

## 34 RESULTS 35

36 Facility survey data were collected from a total of 190 PHCs and 36 DHs. The number of facilities  
37 assessed for each component of structural capacity and staff availability varied (range: 35-36 DHs  
38 and 166-190 PHCs) due to missing data and depending on the availability of respondents during  
39 the time of the survey (**appendix table S5**). Household survey data were available from 671  
40 mothers who delivered in 107 of the 190 study PHCs and 1419 mothers who delivered in one of  
41 the 36 study DHs.  
42  
43  
44

## 45 Facility characteristics 46

47 Most PHCs (95%) were functional for 24 hours per day, but 40% of them were not accessible  
48 throughout the year. A dedicated labour room, maternity ward, operation theatre and store room  
49 was available in most PHCs (94%, 96%, 89% and 96% respectively); an immunisation room was  
50 available in only 76% of the PHCs. While the IPHS guidelines recommend each PHC to have six  
51 beds, the number of sanctioned and available beds, as reported by the MOIC, varied. There were  
52 12 beds on average per PHC but eight PHCs reported having no beds, four of which nonetheless  
53 conducted maternal deliveries.  
54  
55  
56  
57



1  
2  
3 All DHs had a dedicated labour room and maternity ward, but specialised units for antenatal care  
4 and for post-natal care were available in only 69% and 56% of the DHs, respectively. A dedicated  
5 room for counselling was provided in 67% of the DHs. As per the IPHS guidelines, every DH  
6 should have a provision for Special New Born Care units (SNCUs); however, this unit was found  
7 in only 21 of the 36 DHs (58%). In DHs, the number of beds recommended by IPHS guidelines  
8 varies between 75 to 500 depending on the size, terrain, and population of the district; however,  
9 in Bihar, we identified four DHs with fewer than 75 beds available.  
10  
11

## 12 **Availability of services**

13

14 Of the 30 services assessed in 36 DHs and 189 PHCs, seven (23%) and 12 (40%) services were  
15 unavailable in at least 10% of the facilities, respectively. Most of the commonly unavailable  
16 services were related to family planning including medical termination of pregnancy (MTP), non-  
17 scalpel vasectomy, conventional vasectomy, and laparoscopic sterilization. Venereal disease  
18 research laboratory (VDRL) tests conducted during ANC visits were unavailable in 17% and 30%  
19 of the DHs and PHCs, respectively (**figure 1**).  
20  
21

22 For both PHCs and DHs, the main reason for the lack of these services was reported to be lack  
23 of required human resources (**figure 1** and **appendix table S6**). In PHCs, lack of equipment was  
24 reported to be the second most important factor for the unavailability of services such as MTP,  
25 non-scalpel vasectomy and laparoscopic sterilization. Lack of equipment was also the reason for  
26 unavailability of laparoscopic sterilization in 47% of the 36 DHs.  
27  
28  
29  
30  
31  
32  
33  
34  
35  
36  
37  
38  
39  
40  
41  
42  
43  
44  
45  
46  
47  
48  
49  
50  
51  
52  
53  
54  
55  
56  
57  
58  
59  
60

**Figure 1:** Reasons for unavailability of services in (A) primary health centres (PHCs) and (B) district hospitals (DHs)

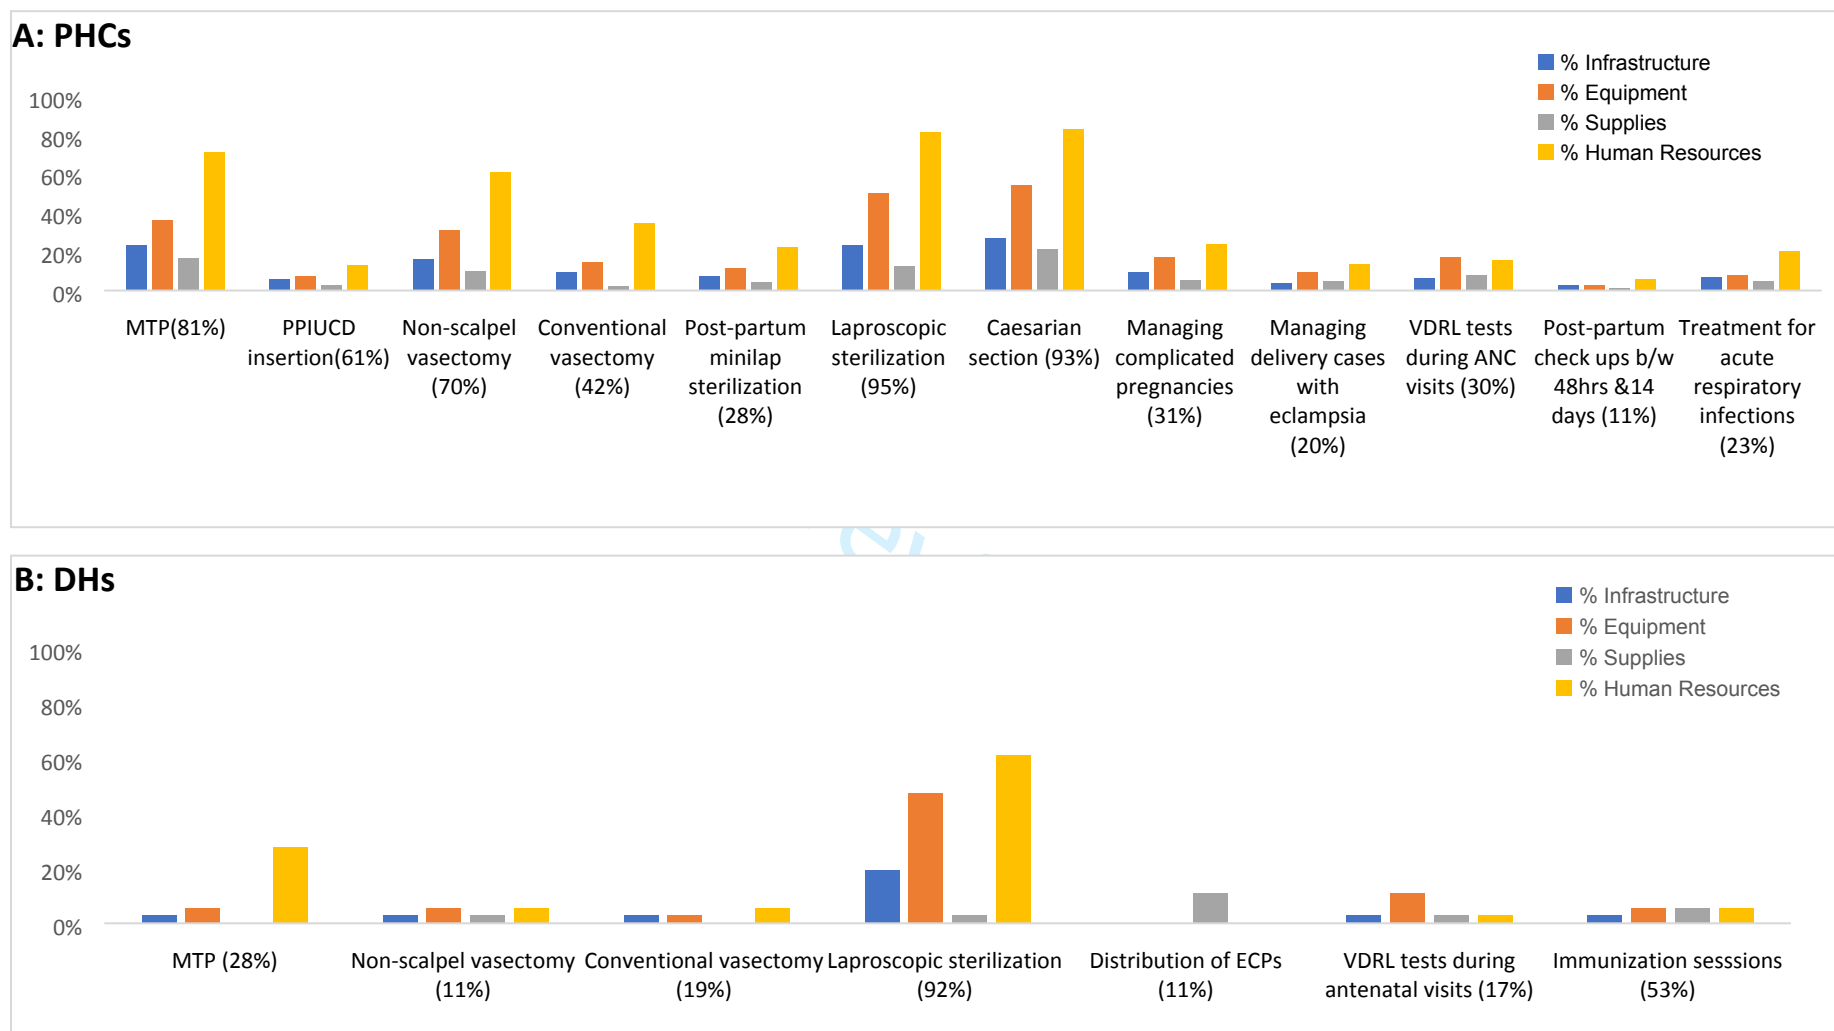

Multiple answers were allowed. Figures in parentheses of x axis report the total unavailability

Abbreviations: MTP: Medical termination of pregnancy; ECP: Emergency contraceptive pill; VDRL: Venereal Disease Research Laboratory; PPIUCD: Postpartum Intrauterine Contraceptive Device; ANC: Ante natal care

## Structural capacity

Overall, the average structural capacity across PHCs was 61% (range: 36-85%) and 67% (range: 50-84%) across DHs. DHs were slightly better equipped on average in terms of availability of infrastructure, equipment and drug supplies (78%, 70%, 52%, respectively) compared with PHCs (67%, 65%, and 50%, respectively). Results varied greatly between facilities, particularly among PHCs (**figure 2**).

**Figure 2:** Structural readiness scores across district hospitals (DHs) and primary health centres (PHCs)

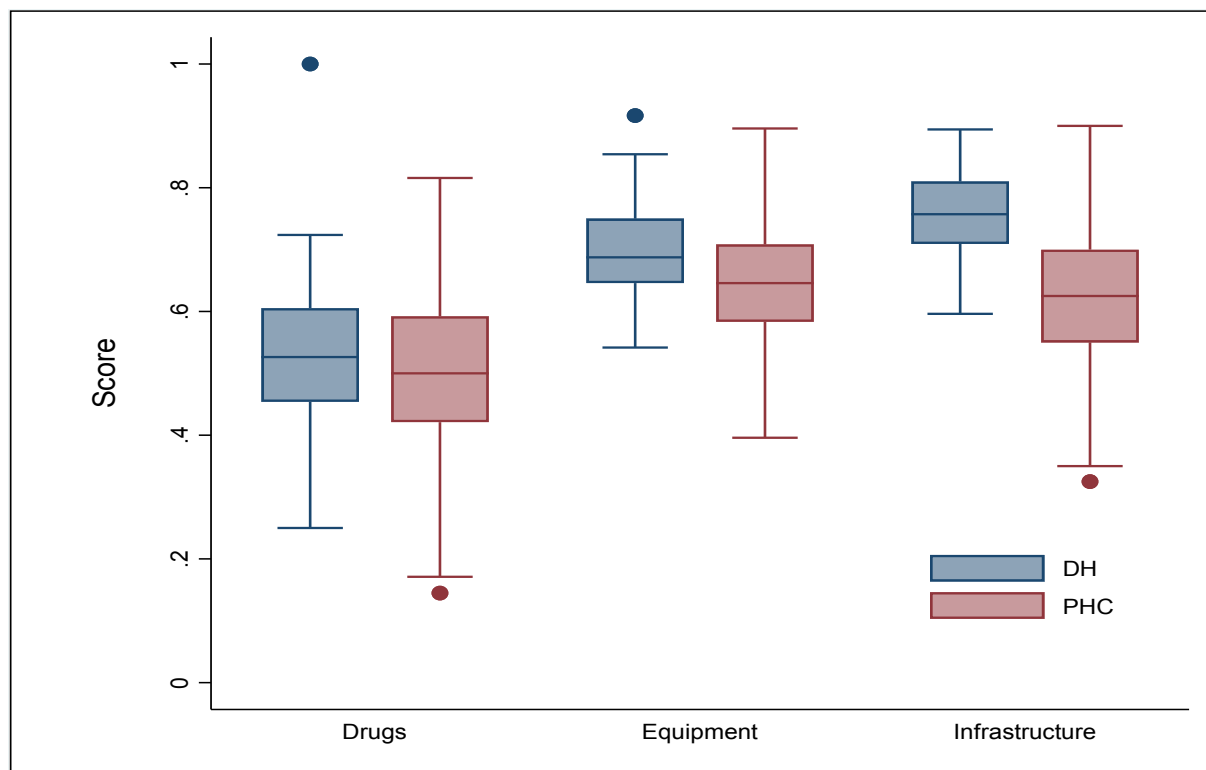

Scores are presented as box plots representing the median and interquartile range (box and whiskers, respectively) and outliers (dots).

### Infrastructure

Of the 12 items assessed in DHs, five (hand washing station in the labour room, telephone connection, water, power and transport) had an average readiness score of greater than 90%. In PHCs, telephone connection was the only component with an average readiness score of over 90% across facilities. Readiness was particularly low with respect to hand washing stations in the immunisation room and laboratory in both DHs and PHCs (**appendix table S7**).

Of all the items assessed in the labour room, the availability of different colour coded bins to segregate waste into infectious and non-infectious sources was the lowest in both PHCs and DHs (54% and 63%, respectively). Emergency transport for referrals was available in only 66% of the PHCs, whereas the DHs performed well in this regard with all DHs having emergency transport available for referrals.

## Equipment and supplies

Neonatal stethoscope and MTP suction were the two most commonly missing items of equipment in PHCs; whereas, in DHs, infantometer and nebulizer were the two most commonly missing items (**appendix table S7**). In the labour room specifically, light examination, feeding tube and oxygen cylinder were the most commonly missing items of equipment in both the DHs and PHCs.

Availability of drugs was the weakest performing area of structural assessment for both DHs and PHCs (figure 1), with only half (50% and 52% on average, respectively) of the essential drugs (n=76) being available. Of 25 essential drugs that should be available in the labour room as per the IPHS guidelines, 62% and 72% were available on average in PHCs and DHs, respectively. Carboprost, hydralazine and methyldopa were the least commonly available of the drugs in both the PHCs and DHs.

## Staff availability

The overall average staffing index for the three main cadres including MOs, ANMs and pharmacists (permanent) was 69% (range: 11-100%) in PHCs, indicating 31% of health worker sanctioned positions, as reported by the MOIC, being unfilled. The average staffing index at PHCs was found to be the highest for the ANMs, indicating a high proportion of sanctioned positions being filled (**table 1**). However, the requirement of ANMs, as mandated by the IPHS guidelines, was fulfilled in only 42% of the PHCs (**table 1**). The mandate of having at least one MO at a PHC was fulfilled at all PHCs. However, the sanctioned positions, as reported by the MOIC, varied and the average staffing index of available to sanctioned MOs was 70% for contractual (n =129) and 68% for permanent staff. The proportion of positions filled in PHCs was the lowest for laboratory technicians (27%). These technicians were, however, supplemented by contractual workers, for whom 92% of sanctioned positions were filled. Almost a third (30%) of the PHCs did not have any pharmacist. RMNCH+ counsellors were available in only four PHCs (2%) and family planning counsellors in six PHCs (3%). None of the PHCs had an infant and young child feeding counsellor.

In DHs, the overall staffing index for three cadres was 55% (range 24-100%). The staffing index amongst the health personnel in DHs was found to be similar to PHCs (**table 1**); the staffing index was also highest for ANMs (78%) and lowest (35%) for laboratory technicians in DHs. For ANMs, the IPHS requirement of 0.45 staff per bed was fulfilled in only 15% of the DHs (**table 1**). The average staffing index for MOs was 52% and the requirement of essential MOs as per the IPHS guidelines was fulfilled in 53% of the DHs. Nearly 60% of the DHs had less than half of the sanctioned positions for MOs and nurses filled.

**Table 1:** Average filled/sanctioned positions for staff and IPHS requirement fulfillment for district hospitals (DHs) and primary health centres (PHCs)

| Designation     | Average filled to sanctioned- DHs | Average filled to sanctioned- PHCs | % DHs fulfilling IPHS requirements | % PHCs fulfilling IPHS requirements |
|-----------------|-----------------------------------|------------------------------------|------------------------------------|-------------------------------------|
| Medical officer | 52% (34)                          | 68% (190)                          | 53% (34)                           | 100% (190)                          |

|                         |          |           |          |           |
|-------------------------|----------|-----------|----------|-----------|
| Staff Nurse             | 44% (33) | 42% (48)  |          | -         |
| Auxiliary nurse midwife | 78% (24) | 81% (173) | 15%(33)* | 42%(173)  |
| Laboratory technician   | 35% (32) | 27% (148) | 0%(32)   | 27%(148)  |
| Compounder/pharmacist   | 56% (32) | 63% (171) | 16%(32)  | 70% (171) |
| Store keeper            | 58% (28) | 57% (101) | 61% (28) | 57%(101)  |

Only permanent positions are considered. Cases where information on sanctioned positions was missing were excluded. Medical officers include physicians, obstetricians, paediatricians and anaesthetists. PHC IPHS guidelines mention to appoint at least 4 Nurse- Midwives. We consider at least 4 ANMs for each facility since the information for Staff Nurse is unavailable for most facilities. \*DH IPHS guidelines mention the requirement for staff nurse/ANM combined and hence we consider the combined availability of staff nurse and ANM

## Reported quality of care

When asked if 11 essential pre- and post-partum services had been carried out, the responses were similar between DHs and PHCs (**table 2**). Almost all mothers reported that hygiene and newborn warmth practices of wearing gloves, wiping the baby dry and wrapping the baby were being practiced in both PHCs and DHs. Provision of skin-to-skin contact was reported by fewer than half of women, regardless of facility type. Measuring blood pressure and advising mothers about their and their baby's health before discharge were received by less than 30% of the mothers.

**Table 2:** Quality of care reported by mothers delivering at the primary health centres (PHCs) and district hospitals (DHs)

| Quality of Care                                                                                                       | PHCs (n =671) |        |            | DHs (n = 1419) |        |            |
|-----------------------------------------------------------------------------------------------------------------------|---------------|--------|------------|----------------|--------|------------|
|                                                                                                                       | Yes           | No     | Don't Know | Yes            | No     | Don't Know |
| Was the baby wrapped in a clean cloth after birth?                                                                    | 97.91%        | 1.34%  | 0.75%      | 96.41%         | 1.20%  | 2.40%      |
| Did this person wear gloves before conducting your delivery?                                                          | 96.87%        | 1.64%  | 1.49%      | 95.49%         | 1.20%  | 3.31%      |
| Was the baby wiped dry after delivery?                                                                                | 95.68%        | 2.53%  | 1.79%      | 93.31%         | 2.47%  | 4.23%      |
| Was the baby weighed after delivery?                                                                                  | 92.55%        | 3.73%  | 3.73%      | 88.94%         | 5.64%  | 5.43%      |
| After delivery, was nothing applied to the cord?                                                                      | 91.36%        | 8.67%  | 0%         | 85.27%         | 14.73% | 0%         |
| Did the person wash hands with soap before conducting your delivery?                                                  | 76.15%        | 3.73%  | 20.12%     | 73.50%         | 5.14%  | 21.35%     |
| Was the baby placed on the mother's abdomen immediately after birth?                                                  | 49.78%        | 42.92% | 7.30%      | 40.03%         | 48.98% | 10.99%     |
| Were you advised by the nurse or anyone else to keep the baby naked on your chest, next to your skin?                 | 35.77%        | 63.49% | 0.75%      | 23.82%         | 75.26% | 0.92%      |
| Did you breastfeed your baby immediately after delivery?                                                              | 24.29%        | 75.71% | 0%         | 21.17%         | 78.48% | 0.24%      |
| Was any advice given to you regarding your health or your baby's health before you were discharged from the facility? | 29.06%        | 70.94% | 0%         | 18.60%         | 81.40% | 0%         |
| Was blood pressure measured after delivery, before discharge?                                                         | 9.99%         | 90.91% | 0%         | 8.67%          | 91.33% | 0%         |

## Relationship between quality indexes

No clear relationship between the facility structural capacity index (composite score for infrastructure, equipment, and drugs), the staffing index (ratio of sanctioned to filled positions), or the quality of care index (average score for 11 facility-based care services among women per facility) was found for PHCs. In DHs, no clear trend was observed between the structural capacity index and quality of care as well as staffing and structural capacity index. However, a positive relationship between the quality of care index and staffing index was evident (**figure 3**).

**Figure 3:** Structural capacity, staffing and quality of care relationship for primary health centres (blue) and district hospitals (orange)

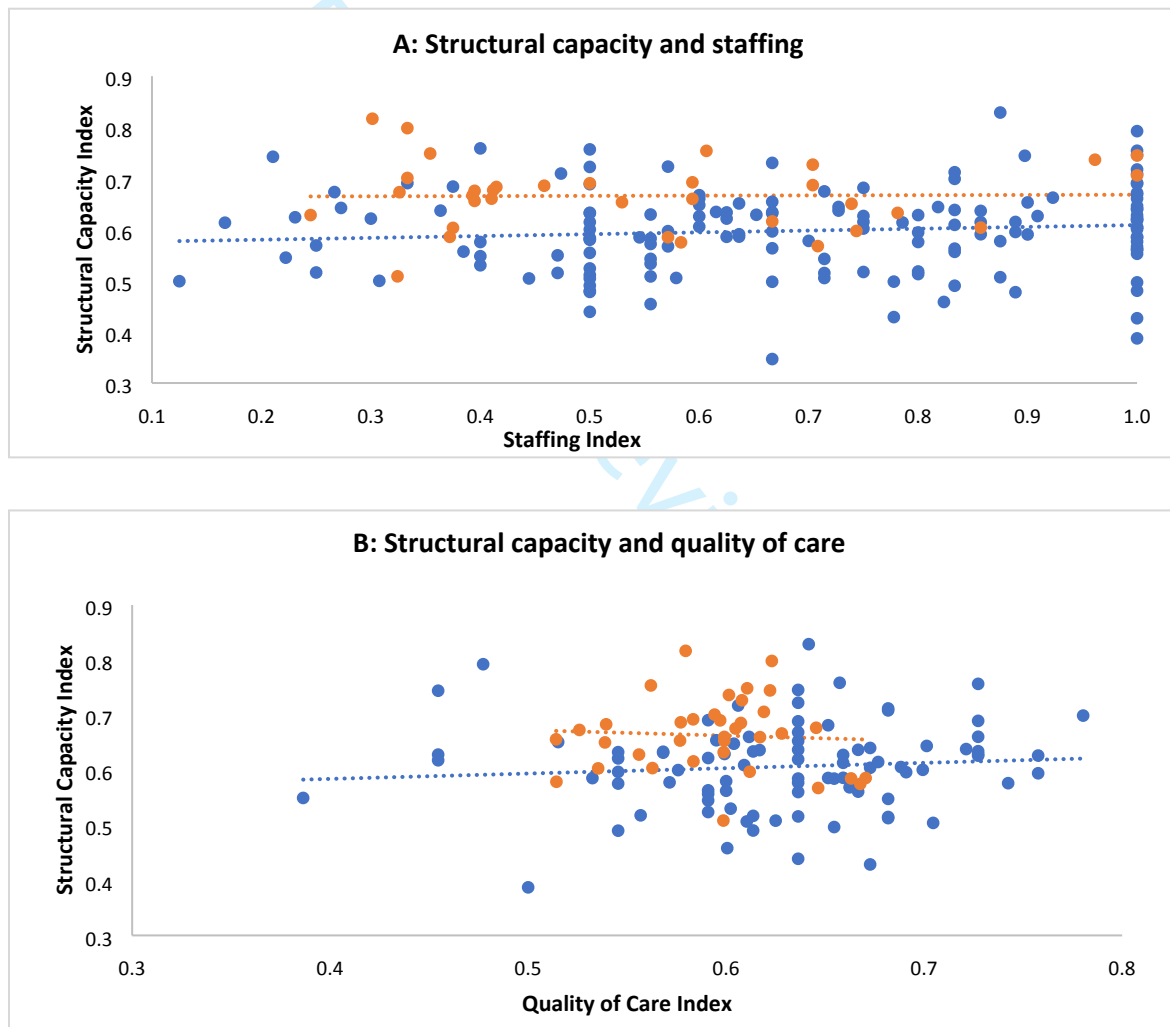

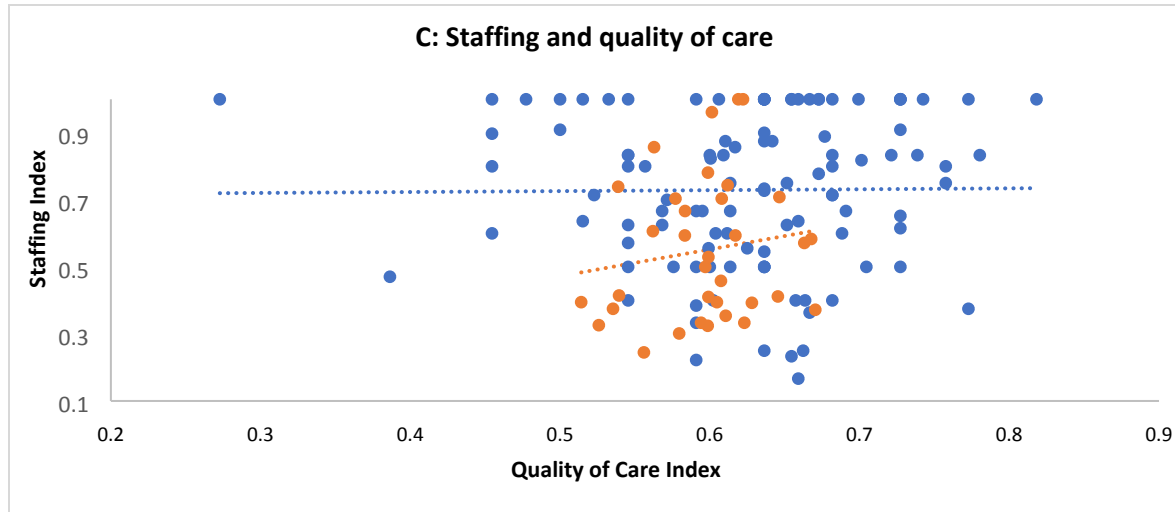

19 Each point represents the indexes for each facility (PHC or DH). The trend line shows the relationship between the  
20 staffing and quality of care across the PHCs (blue) and DHs (orange). Note that axis scales vary.  
21

## 22 DISCUSSION

23  
24 This study provides evidence from all DHs and a large representative sample of block PHCs in  
25 Bihar, describing the gaps that need to be addressed to improve the provision of facility-based  
26 maternal and newborn care. Gaps in the structural capacity of facilities to provide quality care in  
27 terms of basic infrastructure, availability of equipment and supplies, and appropriate staffing were  
28 identified. These are areas that will require coordinated and dedicated efforts if much needed  
29 gains are to be made towards improved quality of facility-based maternal and neonatal care.  
30  
31

32  
33 The results revealed that DHs on average were better in terms of staffing and structural capacity  
34 in comparison with PHCs. However, the trends within the structural capacity were very similar in  
35 both the district and block facilities with availability of supplies being the lowest amongst the  
36 components of structural capacity. It is particularly concerning that DHs are missing drugs to  
37 control blood pressure and treat haemorrhage since they are supposed to deal with women who  
38 are at risk of complications.  
39

40  
41 Maintenance of hygiene is extremely important in clinical areas such as labour rooms with patients  
42 at high risk of acquiring infections. However, assessment of infrastructure readiness revealed a  
43 low level of hygiene and sanitation practices in the facilities. The study identified lack of  
44 recommended handwashing stations in different rooms and colour coded bins in the labour room.  
45 The establishment of a system of accreditation and regular monitoring of quality of hygienic care,  
46 among other interventions, may help to ensure that the facilities have the essential equipment  
47 and infrastructure in place.  
48

49  
50 The most commonly missing equipment in the DHs and PHCs were mostly pertaining to neonatal  
51 care. Access to basic neonatal care is essential to reduce neonatal mortality because between a  
52 quarter and half of all neonatal deaths happen within 24hrs of life and 75% of neonatal deaths  
53 arise in the first week of life.[22] Pre-term birth, severe infections and asphyxia have been globally  
54 identified as the main direct causes of neonatal death. Low birth weight has also been recognized  
55 as an important cause of death.[22] Low-cost interventions including tetanus toxoid vaccination,  
56  
57

1  
2  
3 exclusive breastfeeding, kangaroo mother care for low birthweight infants, and antibiotics for  
4 neonatal infections can reduce mortality.[23] However, our study revealed that skin to skin care  
5 was only being practiced by 36% of the mothers in PHCs and 24% of the mothers in DHs across  
6 Bihar. Immediate breastfeeding practice was also reported by only 24% of the mothers in PHCs  
7 and 21% mothers DHs. These findings suggest that these facilities are not ready to provide quality  
8 neonatal care and are missing simple but vital life-saving interventions.  
9

10 Availability of skilled human resources is another important aspect to provide quality maternal and  
11 newborn care. The data on sanctioned posts, as reported by the facility in charge, were found to  
12 be different from those recommended by IPHS guidelines. This gap between the guidelines and  
13 actual sanctioned posts reflects the lack of translation of policies into practice. In PHCs, while the  
14 essential requirement for MOs was fulfilled in all facilities, the filled to sanctioned ratio was only  
15 68%, indicating the need for more MOs in these facilities. In DHs, the IPHS requirement of staff  
16 nurse/ANM was fulfilled in only 15% of the facilities. In addition, lack of staff was reported as the  
17 main reason for the unavailability of services. Our results specifically indicated a lack of  
18 counsellors at both the block and district facilities. This may have contributed to less than 30%  
19 mothers reporting having received advice about their and their baby's health before discharge.  
20 The positive relationship found between the staffing and quality of care (as reported by mothers)  
21 at the DHs affirms the need to address the gaps in staffing to provide better quality of care.  
22  
23  
24

25 Both DHs and PHCs are particularly important platforms under the health system, with DHs being  
26 the secondary referral level responsible for providing basic specialty services and PHCs being  
27 the first point of contact to a qualified doctor in the public health sector in rural areas. Given that  
28 the PHCs are not equipped to manage complicated cases, including caesarean sections or  
29 provide facilities of SNCU, it is important to have a well-functioning transport system for referrals.  
30 Our findings revealed that 34% of the PHCs did not have an emergency transport for referrals.  
31 While the Government of India recommends the provision of referral system at the facilities, no  
32 systematic step has been taken in this direction so far.[21,24] Lack of skilled staff, inadequate  
33 infrastructure and lack of accountability have been recognized as some of the key reasons for the  
34 failure of referral systems in India.[25]  
35  
36

37 This study has both strengths and limitations. The study draws on data from a large number of  
38 facilities, covering all DHs and a large representative sample of PHCs in Bihar. To our knowledge,  
39 no study of this scale has previously been conducted on facility readiness for maternal and  
40 newborn care in Bihar. The findings of this study are, however, based on data collected from a  
41 single visit to these facilities; the availability of different equipment and supplies might vary over  
42 time. The number of responses varied across and within the components of infrastructure,  
43 supplies, equipment and staffing, leading to incomplete data in some facilities. With respect to  
44 household data, women providing information on quality of care were not representative of those  
45 delivering at facilities and the sampling was not proportional to the number of deliveries at each  
46 facility. Hence, findings on quality of care at facilities as reported in the household survey should  
47 be treated as exploratory findings only. The scope of this study is limited to assessing the  
48 structural capacity of the facilities to deliver quality care and the care as reported by the mothers.  
49 However, there could be multiple other components that influence quality of care (e.g. skills and  
50 competencies of health personnel delivering care) that were not explored in this study.  
51  
52  
53

## 54 CONCLUSION

55  
56  
57



1  
2  
3 Presence of well-functioning facilities, with required structural and staffing capacity, is crucial for  
4 providing maternal and newborn care that translates to better maternal and child outcome. Being  
5 a highly populated state with poor health outcomes, the state of Bihar requires particular attention  
6 if India is to achieve the sustainable development goals targets for maternal and newborn health.  
7 This study provides a description of the current capacity of public facilities in Bihar to provide  
8 quality maternal and neonatal care, unearthing particular gaps in neonatal equipment,  
9 infrastructure required to maintain hygiene, and staffing capacity at the facilities. Our results  
10 suggest presence of heterogeneity in the strengths and weaknesses across the facilities. A better  
11 understanding is needed to assess the cause of this variation which could help design tailored  
12 and appropriate interventions at these facilities to improve quality of care. This study lays the  
13 foundation for ongoing studies in Bihar to explore the relationship between quality of care and  
14 health outcomes. Increased focus on effective coverage and quality of facility-based care for  
15 mothers and newborns is needed if necessary gains are going to be made in saving lives in this  
16 high-burden setting.  
17  
18  
19  
20

### 21 **Acknowledgements**

22  
23 The authors thank Sneha Lamba, Rakesh Chandra, Madhavi Misra, Tanmay Mahapatra and the  
24 entire field Team of OPM for their contribution to this manuscript.  
25  
26  
27

### 28 **Contributor ship Statement**

29  
30 T.NL. and S.F. conceived the idea for the manuscript. J.K. managed the data collection and  
31 supervised the data cleaning. J.K. led the data analysis and wrote the manuscript with the support  
32 of G.M. J.K. and G.M. jointly interpreted the data. G.M. supervised and edited the manuscript.  
33  
34 Both T.NL. and S.F. reviewed the paper. All authors were involved in the interpretation of data,  
35 critically reviewed the manuscript and approved the final version.  
36  
37  
38  
39

### 40 **Competing Interests**

41  
42 None.  
43  
44

### 45 **Funding**

46  
47 This study was supported by Bill and Melinda Gates Foundation.  
48  
49  
50

### 51 **Data sharing Statement**

52  
53 Data used for this manuscript will be made available on request.  
54  
55  
56  
57

## References

1. WHO, UNICEF, UNFPA, World Bank Group and UNPD. Maternal mortality in 1990-2015. 2015.
2. Sustainable Development Knowledge Platform. <https://sustainabledevelopment.un.org/sdg3>
3. Government of India Planning Commission. Press note on poverty estimates, 2011-12. Press Information Bureau. 2013.
4. Gol. Sample Registration System Statistical Report 2016. 2017.
5. Gol. Sample Registration System Statistical Report 2012 . New Delhi; 2013. [http://www.censusindia.gov.in/vital\\_statistics/SRS\\_Reports\\_2012.html](http://www.censusindia.gov.in/vital_statistics/SRS_Reports_2012.html)
6. National Family Health Survey - 4. 2015;
7. International Institute for Population Sciences. State Fact Sheet Bihar. National Family Health Survey-4. 2015. [http://rchiips.org/NFHS/pdf/NFHS4/BR\\_FactSheet.pdf](http://rchiips.org/NFHS/pdf/NFHS4/BR_FactSheet.pdf)
8. Bhutta ZA, Das JK, Bahl R, Lawn JE, Salam RA, Paul VK, et al. Can available interventions end preventable deaths in mothers, newborn babies, and stillbirths, and at what cost? *Lancet*. 2014;384(9940):347–70.
9. Lim SS, Dandona L, Hoisington JA, James SL, Hogan MC, Gakidou E. India's Janani Suraksha Yojana, a conditional cash transfer programme to increase births in health facilities: an impact evaluation. *Lancet*. 2010;375(9730):2009–23.
10. Das A, Rao D, Hagopian A. India's Janani Suraksha Yojana: Further review needed. Vol. 377, *The Lancet*. 2011. p. 295–6.
11. Gita G, Bharti S, Shashi K, Arvind K. Trends in maternal mortality and impact of janani suraksha yojana (JSY) on maternal mortality ratio in a tertiary referral hospital. *J Obstet Gynecol India*. 2012;62(3):307–11.
12. Dickson KE, Simen-Kapeu A, Kinney M V., Huicho L, Vesel L, Lackritz E, et al. Every Newborn: Health-systems bottlenecks and strategies to accelerate scale-up in countries. Vol. 384, *The Lancet*. 2014. p. 438–54.
13. Moxon SG, Lawn JE, Dickson KE, Simen-Kapeu A, Gupta G, Deorari A, et al. Inpatient care of small and sick newborns: A multi-country analysis of health system bottlenecks and potential solutions. *BMC Pregnancy Childbirth*. 2015;15.
14. Sharma G, Mathai M, Dickson KE, Weeks A, Hofmeyr GJ, Lavender T, et al. Quality care during labour and birth : a multi- country analysis of health system bottlenecks and potential solutions. *BMC Pregnancy Childbirth*. 2015;15(Suppl 2):S2. <http://www.biomedcentral.com/1471-2393/15/S2/S2>
15. WHO. Standards for Improving Quality of Maternal and Newborn Care in Health Facilities. Who. 2016. <http://apps.who.int/iris/bitstream/10665/249155/1/9789241511216->

- eng.pdf?ua=1
16. Ministry of Health and Family Welfare, GoI. Rural Health Statistics, 2014-15. 2015.
  17. CARE. Bihar Technical Support Programme - CARE India. 2017.  
<https://www.careindia.org/project/technical-assistance-to-the-government-of-bihar-improving-health-nutrition-coverage-and-outcomes/>
  18. Das A, Chatterjee R, Karthick M, Mahapatra T, Chaudhuri I. The influence of seasonality and community-based health worker provided counselling on exclusive breastfeeding - Findings from a cross-sectional survey in India. Vol. 11, PLoS ONE. 2016.
  19. WHO. Service Availability and Readiness Assessment (SARA) [Internet]. World Health Organisation (WHO). 2016. Available from:  
[http://www.who.int/healthinfo/systems/sara\\_indicators\\_questionnaire/en/](http://www.who.int/healthinfo/systems/sara_indicators_questionnaire/en/)
  20. Services DG of H, India M of H& FWG of. Indian Public Health Standards (Iphs) Guidelines for Primary Health Centres Revised 2012. Directorate General of Health Services Ministry of Health & Family Welfare Government of India. 2012.  
<http://health.bih.nic.in/Docs/Guidelines/Guidelines-PHC-2012.pdf>
  21. Ministry of Health & Family Welfare. Indian Public Health Standards (IPHS) Guidelines for District Hospitals (101 to 500 Bedded. 2012.  
<http://nrhm.gov.in/images/pdf/guidelines/iphs/iphs-revised-guidlines-2012/district-hospital.pdf>
  22. Lawn JE, Cousens S, Zupan J. 4 Million neonatal deaths: When? Where? Why? Vol. 365, Lancet. 2005. p. 891–900.
  23. Martines J, Paul VK, Bhutta ZA, Koblinsky M, Soucat A, Walker N, et al. Neonatal survival: A call for action. Vol. 365, Lancet. 2005. p. 1189–97.
  24. Vora KS, Mavalankar D V., Ramani K V., Upadhyaya M, Sharma B, Iyengar S, et al. Maternal health situation in India: A case study. J Heal Popul Nutr. 2009;27(2):184–201.
  25. Anil Kumar Gupta, Shweta Talati, Sudip Bhattacharya AS. Health System Strengthening-Focussing on Referrals: An Analysis from India. JOJ Nurs Heal care. 2017;2(4).

## APPENDIX 1

### Additional methods

#### *Infrastructure scoring*

A score out of 1 was generated for each of these components. These scores were added, giving equal weight to each component and divided by the total components to generate an overall score ranging from 0 to 1, which was then converted to a percentage by multiplying by 100.

To compute a score for the component 'power/electricity' in the facilities, a value 1 was assigned to the facilities with continuous power, 0.75 to the facilities which reported occasional disruption to power in summer only, 0.5 to the facilities that were facing occasional disruption to power throughout the year, 0.25 to facilities with regular interruption to power and 0 to the facilities that reported no power supply. In cases where back-up was available that met the entire needs of the facility the above score was replaced by 1. For the 'water' score, 0.5 was assigned for availability of 24\*7 running water and 0.5 if filtered water was available to patients. For telephone connection, a value 1 was assigned if it was available, else 0.

The transport score was computed by giving a score 0.5 to availability of at least one functional ambulance and an additional 0.5 to 24\*7 availability. For toilets, 0.5 was assigned in case a functional toilet was available and 0.25 in case a toilet was available but not functional. Another 0.5 was assigned if the condition of the toilet was good and 0.25 if it needed repair/maintenance. For handwashing stations, 1 was assigned for the availability for elbow tap with running water and 0.5 was assigned for tap (without elbow) with running water. For computer and internet, 0.5 was assigned if the hospital had provided a computer and an additional 0.5 if there was internet connection available at the facility. For blood bank, 1 was assigned if there was a blood bank provision at the hospital, else 0.

For room availability, a score of 1 was assigned for the availability of each of the 16 rooms and then, it was added across rooms and divided by 16 to get a score out of 1. The 16 rooms were waiting room, labour room, maternity ward, immunization room, counselling room, operation theatre, store room, paediatrics, labour room eclampsia, SNCU (sick new born care unit), NBSU (new born stabilization units), septic labour room, antenatal ward, postnatal ward, postpartum ward and post-operative ward.

#### *Equipment scoring*

To compute the equipment score, a value 1 was assigned to each equipment if it was available and functional, else it was assigned 0. After computing the score for each equipment, we divided it by 48 (total equipment) to get a score out of 1 and multiplied by 100 to get the percentage distribution.

#### *Supplies/drugs scoring*

The availability of a drug was assigned a value 1, else it was assigned 0. The scores for each of the drugs were added, divided by the total (76) and then multiplied by 100 to get the percentage distribution.

**Table S1:** Infrastructure assessed

| Infrastructure Components        | Facility Level |
|----------------------------------|----------------|
| Handwashing in immunization Room | PHCs, DHs      |
| Handwashing in laboratory        | PHCs, DHs      |
| Handwashing in operation theatre | PHCs, DHs      |
| Toilet in labour room            | PHCs, DHs      |
| Handwashing in labour room       | PHCs, DHs      |
| Transport                        | PHCs, DHs      |
| Water                            | PHCs, DHs      |
| Power                            | PHCs, DHs      |
| Phone                            | PHCs, DHs      |
| Room availability                | DHs            |
| Blood bank                       | DHs            |
| Computer and internet            | DHs            |

Abbreviations: PHC: Primary health centre, DH: District hospital

**Table S2:** Equipment assessed in district hospitals and primary health centres

| Equipment                      |
|--------------------------------|
| Caserean kit                   |
| Neonatal stethoscope           |
| MTP suction                    |
| Light examination              |
| NSV kit                        |
| Infantometer                   |
| Baby incubator                 |
| MTP kit                        |
| Nebulizer                      |
| Feeding tube                   |
| Shadowless lamp (OT)           |
| Conventional vasectomy kit     |
| Oxygen cylinder (LR)           |
| Minilap kit                    |
| Resuscitation kit              |
| Spotlight (OT)                 |
| Autoclave (NBCC)               |
| Stethoscope (OT)               |
| IV stand (OT)                  |
| Step up stool                  |
| Immunization table             |
| Oxygen cylinder (OT)           |
| Hub cutter (immunization room) |
| Partograph                     |
| Phototherapy unit              |

|                                 |
|---------------------------------|
| Cord clamp                      |
| Thermometer (LR)                |
| IV cannula                      |
| Hub cutter (NBCC)               |
| PPIUCD kit                      |
| Pump suction                    |
| Autoclave (OT)                  |
| Freeze tags                     |
| Stethoscope (LR)                |
| Sterile gloves                  |
| Radiant warmer                  |
| Thermometer (immunization room) |
| Delivery kit                    |
| IUCD kit                        |
| Refrigerator                    |
| Ambu bag (NBCC)                 |
| Deep freezer                    |
| Operating table                 |
| Vaccine Carrier                 |
| BP Instrument                   |
| Labour table                    |
| Baby weighing machine           |
| Ice packs                       |

*Information in parantheses represent the room in which the equipment was checked.*

Abbreviations: MTP: Medical termination of pregnancy; NSV: Non-scalpel vasectomy; OT: Operation theatre; LR: labour room; NBCC: Newborn care corner; PPIUCD: Postpartum Intrauterine Contraceptive Device; IUCD: Intra-Uterine Contraceptive Devices; BP: Blood pressure

**Table S3:** Drugs assessed in district hospitals and primary health centres

| Drugs |                               |
|-------|-------------------------------|
| 1     |                               |
| 2     |                               |
| 3     |                               |
| 4     | Amitriptyline                 |
| 5     | Captopril                     |
| 6     | Suxamethonium bromide         |
| 7     | Mephenteramine                |
| 8     | Carboprost                    |
| 9     | Miltefosine                   |
| 10    | Syrup salbutamol              |
| 11    | Hydralazine                   |
| 12    | Omeprazole                    |
| 13    | Chlorine solution             |
| 14    | Halothane (inhalation)        |
| 15    | Menadione (Vit K3)            |
| 16    | IUCD 375                      |
| 17    | Methyldopa                    |
| 18    | Simvastatin                   |
| 19    | Amphotericin B                |
| 20    | Liposomal amphotericin B      |
| 21    | Phytonadione                  |
| 22    | Glibenclamide                 |
| 23    | Skin disinfectant             |
| 24    | Vitamin K                     |
| 25    | Thiopental (powder)           |
| 26    | Dopamine                      |
| 27    | OPV                           |
| 28    | Deriphylline                  |
| 29    | BCG                           |
| 30    | Hepatitis B                   |
| 31    | DPT                           |
| 32    | Pentavalent                   |
| 33    | Frusemide                     |
| 34    | Measles                       |
| 35    | Epinephrine                   |
| 36    | Syrup vitamin A               |
| 37    | Iron folic acid – small       |
| 38    | Atenolol                      |
| 39    | Pentazocin chloride           |
| 40    | Ceftriaxone                   |
| 41    | Methylegometrine (Methargine) |
| 42    | Nifedepine                    |
| 43    | Xylocard                      |
| 44    | Promethazine                  |
| 45    | Betamethasone                 |
| 46    | Hydrocortisone succinate      |
| 47    |                               |
| 48    |                               |
| 49    |                               |
| 50    |                               |
| 51    |                               |
| 52    |                               |
| 53    |                               |
| 54    |                               |
| 55    |                               |
| 56    |                               |
| 57    |                               |
| 58    |                               |
| 59    |                               |
| 60    |                               |

|    |                             |
|----|-----------------------------|
| 1  |                             |
| 2  |                             |
| 3  |                             |
| 4  | Antiseptic solution         |
| 5  | Tetanus Toxoid              |
| 6  | Pheneramine maleate         |
| 7  | Adrenaline                  |
| 8  | Co-trimoxazole              |
| 9  |                             |
| 10 | Injection ranitidine        |
| 11 | Zinc tablets                |
| 12 | Syrup paracetamol           |
| 13 | IUCD 380A                   |
| 14 | DEC (Diethyl Carbamazine)   |
| 15 | Iron folic acid – Large     |
| 16 | Amoxicillin                 |
| 17 | Metoclopramide              |
| 18 | OCPs (Mala-N)               |
| 19 | Ampicillin                  |
| 20 | Calcium gluconate           |
| 21 | ECPs                        |
| 22 | Lignocaine hydrochloride 2% |
| 23 | Misoprostol                 |
| 24 | Condoms (Nirodh)            |
| 25 | Ciprofloxacin               |
| 26 | Diclofenac                  |
| 27 | Magnesium sulphate          |
| 28 | Gentamycin                  |
| 29 | Atropine                    |
| 30 | Oxytocin                    |
| 31 | Albendazole                 |
| 32 | Ketamine                    |
| 33 | Diazepam                    |
| 34 | ORS                         |
| 35 | Dexamethasone               |
| 36 | Metronidazole               |
| 37 | Paracetamol                 |
| 38 |                             |
| 39 |                             |
| 40 |                             |
| 41 |                             |
| 42 |                             |
| 43 |                             |
| 44 |                             |
| 45 |                             |

Abbreviation: IUCD: Intra-Uterine Contraceptive Devices; BCG: Bacille Calmette Guerin; DPT: Diphtheria, Pertussis and tetanus; OPV: Oral Polio Vaccine; ORS: Oral Rehydration Solution; OCP: Oral contraceptive pill; ECP: Emergency contraceptive pill



**Table S4:** Essential and Desirable Staff Guidelines at district hospitals (DHs) and primary health centres (PHCs) as per IPHS Guidelines**A: PHCs**

| IPHS Guidelines<br>Staff | Type A    |           | Type B    |           |
|--------------------------|-----------|-----------|-----------|-----------|
|                          | Essential | Desirable | Essential | Desirable |
| Medical Officer-MBBS     | 1         |           | 1         | 1         |
| Medical Officer-AYUSH    |           | 1         |           | 1         |
| Pharmacist               | 1         |           | 1         |           |
| Nurse-midwife (ANMs)     | 3         | 1         | 4         | 1         |
| Laboratory Technician    | 1         |           | 1         |           |

Type A PHC: PHC with delivery load of less than 20 deliveries in a month and Type B PHC: PHC with delivery load of 20 or more deliveries in a month

**B: DHs**

| IPHS Requirements     | 100 Beds | 200 Beds | 300 Beds | 400 Beds | 500 Beds |
|-----------------------|----------|----------|----------|----------|----------|
| Medical officer       | 11       | 13       | 15       | 19       | 23       |
| Staff Nurse/ANMs      | 45       | 90       | 135      | 180      | 225      |
| Lab Technician        | 6        | 9        | 12       | 15       | 18       |
| Compounder/Pharmacist | 5        | 7        | 9        | 11       | 13       |
| Store Keeper          | 1        | 1        | 2        | 2        | 2        |

**Table S5:** Number of respondents at district hospitals (DHs) and primary health centres (PHCs).

| No. of respondents at     |      |  | Information covered                              |
|---------------------------|------|--|--------------------------------------------------|
| No. of respondents at DHs | PHCs |  |                                                  |
| 36                        | 190  |  | Overall Infrastructure, Staffing                 |
| 35                        | 171  |  | Laboratory: Infrastructure                       |
| 36                        | 179  |  | Labour room: Infrastructure, Equipment, Supplies |
| 35                        | 181  |  | Immunization room: Infrastructure, Equipment     |
| 36                        | 166  |  | Operation Theatre: Infrastructure, Equipment     |
| 35                        | 177  |  | Drug Store room: Supplies                        |

Note: This table shows the number of respondents that were available for each of these components. The information on sub-components could vary based on the knowledge of the respondent.

**Table S6:** Reasons for unavailability of services at district hospitals (DHs) and primary health centres (PHCs)

| Services                   | % Unavailable |      | Reasons for unavailability |      |           |      |       |      |          |      |
|----------------------------|---------------|------|----------------------------|------|-----------|------|-------|------|----------|------|
|                            | DHs           | PHCs | Infrastructure             |      | Equipment |      | Drugs |      | Supplies |      |
|                            |               |      | DHs                        | PHCs | DHs       | PHCs | DHs   | PHCs | DHs      | PHCs |
| MTP                        | 28%           | 81%  | 3%                         | 23%  | 6%        | 37%  | 0%    | 17%  | 28%      | 71%  |
| IUCD insertion             | 0%            | 3%   | 0%                         | 1%   | 0%        | 1%   | 0%    | 0%   | 0%       | 2%   |
| IUCD removal               | 0%            | 3%   | 0%                         | 1%   | 0%        | 1%   | 0%    | 0%   | 0%       | 2%   |
| Post-partum IUCD insertion | 0%            | 16%  | 0%                         | 6%   | 0%        | 7%   | 0%    | 3%   | 0%       | 13%  |
| Non-scalpel vasectomy      | 11%           | 70%  | 3%                         | 16%  | 6%        | 31%  | 3%    | 10%  | 6%       | 61%  |

|                                                       |     |     |     |     |     |     |     |     |     |     |
|-------------------------------------------------------|-----|-----|-----|-----|-----|-----|-----|-----|-----|-----|
| Conventional vasectomy                                | 19% | 42% | 3%  | 10% | 3%  | 15% | 0%  | 2%  | 6%  | 35% |
| Minilap tubectomy                                     | 3%  | 8%  | 3%  | 2%  | 0%  | 2%  | 0%  | 0%  | 3%  | 7%  |
| Post-partum minilap sterilization                     | 3%  | 28% | 0%  | 7%  | 3%  | 12% | 0%  | 4%  | 3%  | 22% |
| Laparoscopic sterilization                            | 92% | 95% | 19% | 23% | 47% | 50% | 3%  | 13% | 61% | 81% |
| Distribution of condoms                               | 6%  | 3%  | 0%  | 0%  | 0%  | 0%  | 3%  | 1%  | 0%  | 2%  |
| Distribution of OCPs                                  | 3%  | 3%  | 0%  | 0%  | 0%  | 0%  | 3%  | 1%  | 0%  | 2%  |
| Distribution of ECPs                                  | 11% | 6%  | 0%  | 1%  | 0%  | 0%  | 11% | 2%  | 0%  | 3%  |
| Normal delivery                                       | 0%  | 5%  | 0%  | 2%  | 0%  | 2%  | 0%  | 1%  | 0%  | 3%  |
| Caesarian section                                     | 3%  | -   | 3%  | -   | 3%  | -   | 0%  | -   | 0%  | -   |
| Managing complicated pregnancies                      | 0%  | 31% | 0%  | 10% | 0%  | 17% | 0%  | 5%  | 0%  | 24% |
| Managing delivery cases with eclampsia                | 8%  | 20% | 0%  | 4%  | 0%  | 10% | 0%  | 5%  | 8%  | 14% |
| Registration of pregnancies                           | 0%  | 2%  | 0%  | 0%  | 0%  | 1%  | 0%  | 0%  | 0%  | 1%  |
| Antenatal care visits                                 | 0%  | 2%  | 0%  | 0%  | 0%  | 1%  | 0%  | 0%  | 0%  | 1%  |
| Distribution of IFA tablets                           | 0%  | 5%  | 0%  | 0%  | 0%  | 1%  | 0%  | 4%  | 0%  | 1%  |
| Tetanus toxoid vaccinations                           | 3%  | 1%  | 3%  | 0%  | 0%  | 1%  | 0%  | 0%  | 0%  | 1%  |
| VDRL tests during antenatal visits                    | 17% | 30% | 3%  | 6%  | 11% | 17% | 3%  | 8%  | 3%  | 16% |
| BP tests during antenatal visits                      | 0%  | 1%  | 0%  | 0%  | 0%  | 1%  | 0%  | 0%  | 0%  | 1%  |
| HB tests during antenatal visits                      | 0%  | 8%  | 0%  | 1%  | 0%  | 5%  | 0%  | 4%  | 0%  | 5%  |
| Weighing of newborns at birth                         | 0%  | 4%  | 0%  | 2%  | 0%  | 2%  | 0%  | 1%  | 0%  | 3%  |
| Neonatal resuscitation in cases with asphyxia         | 3%  | 7%  | 3%  | 3%  | 0%  | 5%  | 0%  | 2%  | 3%  | 6%  |
| Post-partum check ups within 48hrs of delivery        | 0%  | 5%  | 0%  | 2%  | 0%  | 2%  | 0%  | 1%  | 0%  | 4%  |
| Post-partum check ups b/w 48hrs & 14 days of delivery | 0%  | 11% | 0%  | 3%  | 0%  | 3%  | 0%  | 1%  | 0%  | 6%  |
| Immunization sessions                                 | 53% | 2%  | 3%  | 0%  | 6%  | 1%  | 6%  | 0%  | 6%  | 2%  |
| Treatment for diarrhea                                | 0%  | 3%  | 0%  | 1%  | 0%  | 2%  | 0%  | 1%  | 0%  | 2%  |
| Treatment for acute respiratory infections            | 8%  | 23% | 3%  | 7%  | 3%  | 8%  | 0%  | 5%  | 3%  | 20% |

Abbreviations: MTP: Medical termination of pregnancy; IUCD: Intra-Uterine Contraceptive Devices; OCP: Oral contraceptive pill; ECP: Emergency contraceptive pill; IFA: Iron folic acid

**Table S7:** Most commonly missing and available structural capacity items across primary health centres and district hospitals

|                        | Infrastructure                         |                         | Equipment                                                     |                                                                       | Drugs                                                  |                                                                                 |
|------------------------|----------------------------------------|-------------------------|---------------------------------------------------------------|-----------------------------------------------------------------------|--------------------------------------------------------|---------------------------------------------------------------------------------|
|                        | Most commonly missing                  | Most commonly available | Most commonly missing                                         | Most commonly available                                               | Most commonly missing                                  | Most commonly available                                                         |
| Primary health centres | Handwashing in immunization room (13%) | Water (81%)             | Neonatal stethoscope (16%)                                    | Deep freezer, Ambu bag (97%)                                          | Amitriptyline (12%)                                    | ORS (95%)                                                                       |
|                        | Handwashing in laboratory (37%)        | Power (87%)             | MTP suction (17%)                                             | Operating table, labour table, BP Instrument, vaccine carrier (98%)   | Captopril (14%)                                        | Dexamethasone (99%)                                                             |
|                        | Handwashing in OT (60%)                | Phone (93%)             | Light examination (20%)                                       | Baby weighing machine, ice packs (99%)                                | Suxamethonium bromide, mephenteramine (16%)            | Paracetamol, metronidazole (100%)                                               |
| District hospitals     | Handwashing in immunization room (19%) | Water (97%)             | Infantometer, nebulizer, baby incubator (14%)                 | IV cannula, PPIUCD kit, ice packs (94%)                               | Captopril, phytanodiane, simvastin, IUCD 35 (3%)       | Atropine, DPT (94%)                                                             |
|                        | Handwashing in laboratory (47%)        | Power (99%)             | Neonatal stethoscope, MTP suction (39%)                       | Vaccine carrier, operating table, delivery kit, oxygen cylinder (97%) | Amritriptyline (6%)                                    | Dexamethasone, metronidazole, paracetamol, BCG, OPV, measles, pentavalent (97%) |
|                        | Room Availability (64%)                | Transport (100%)        | Light examination, resuscitation kit, phototherapy unit (42%) | Labour table, MTP kit, IUCD kit, Ambu bag, IV stand (100%)            | Glibenclamide, suxamethonium bromide, syrup vit A (8%) | Diazepam, tetanus toxoid (100%)                                                 |

STROBE Statement—Checklist of items that should be included in reports of *cross-sectional studies*

|                              | Item No | Recommendation                                                                                                                                                                                               | Page No |
|------------------------------|---------|--------------------------------------------------------------------------------------------------------------------------------------------------------------------------------------------------------------|---------|
| <b>Title and abstract</b>    | 1       | (a) Indicate the study's design with a commonly used term in the title or the abstract                                                                                                                       | 1       |
|                              |         | (b) Provide in the abstract an informative and balanced summary of what was done and what was found                                                                                                          | 1       |
| <b>Introduction</b>          |         |                                                                                                                                                                                                              |         |
| Background/rationale         | 2       | Explain the scientific background and rationale for the investigation being reported                                                                                                                         | 2       |
| Objectives                   | 3       | State specific objectives, including any prespecified hypotheses                                                                                                                                             | 3       |
| <b>Methods</b>               |         |                                                                                                                                                                                                              |         |
| Study design                 | 4       | Present key elements of study design early in the paper                                                                                                                                                      | 3       |
| Setting                      | 5       | Describe the setting, locations, and relevant dates, including periods of recruitment, exposure, follow-up, and data collection                                                                              | 3       |
| Participants                 | 6       | (a) Give the eligibility criteria, and the sources and methods of selection of participants                                                                                                                  | 4       |
| Variables                    | 7       | Clearly define all outcomes, exposures, predictors, potential confounders, and effect modifiers. Give diagnostic criteria, if applicable                                                                     | 5       |
| Data sources/<br>measurement | 8*      | For each variable of interest, give sources of data and details of methods of assessment (measurement). Describe comparability of assessment methods if there is more than one group                         | 4       |
| Bias                         | 9       | Describe any efforts to address potential sources of bias                                                                                                                                                    | 2       |
| Study size                   | 10      | Explain how the study size was arrived at                                                                                                                                                                    | 3       |
| Quantitative variables       | 11      | Explain how quantitative variables were handled in the analyses. If applicable, describe which groupings were chosen and why                                                                                 | 4       |
| Statistical methods          | 12      | (a) Describe all statistical methods, including those used to control for confounding                                                                                                                        | 5,6     |
|                              |         | (b) Describe any methods used to examine subgroups and interactions                                                                                                                                          | 6       |
|                              |         | (c) Explain how missing data were addressed                                                                                                                                                                  | 6       |
|                              |         | (d) If applicable, describe analytical methods taking account of sampling strategy                                                                                                                           |         |
|                              |         | (e) Describe any sensitivity analyses                                                                                                                                                                        |         |
| <b>Results</b>               |         |                                                                                                                                                                                                              |         |
| Participants                 | 13*     | (a) Report numbers of individuals at each stage of study—eg numbers potentially eligible, examined for eligibility, confirmed eligible, included in the study, completing follow-up, and analysed            | 6       |
|                              |         | (b) Give reasons for non-participation at each stage                                                                                                                                                         | 6       |
|                              |         | (c) Consider use of a flow diagram                                                                                                                                                                           |         |
| Descriptive data             | 14*     | (a) Give characteristics of study participants (eg demographic, clinical, social) and information on exposures and potential confounders                                                                     | 6,7     |
|                              |         | (b) Indicate number of participants with missing data for each variable of interest                                                                                                                          | 6       |
| Outcome data                 | 15*     | Report numbers of outcome events or summary measures                                                                                                                                                         | 6       |
| Main results                 | 16      | (a) Give unadjusted estimates and, if applicable, confounder-adjusted estimates and their precision (eg, 95% confidence interval). Make clear which confounders were adjusted for and why they were included | 7-12    |

|                          |    |                                                                                                                                                                            |       |
|--------------------------|----|----------------------------------------------------------------------------------------------------------------------------------------------------------------------------|-------|
|                          |    | (b) Report category boundaries when continuous variables were categorized                                                                                                  |       |
|                          |    | (c) If relevant, consider translating estimates of relative risk into absolute risk for a meaningful time period                                                           |       |
| Other analyses           | 17 | Report other analyses done—eg analyses of subgroups and interactions, and sensitivity analyses                                                                             | 7-12  |
| <b>Discussion</b>        |    |                                                                                                                                                                            |       |
| Key results              | 18 | Summarise key results with reference to study objectives                                                                                                                   | 13,14 |
| Limitations              | 19 | Discuss limitations of the study, taking into account sources of potential bias or imprecision. Discuss both direction and magnitude of any potential bias                 | 14    |
| Interpretation           | 20 | Give a cautious overall interpretation of results considering objectives, limitations, multiplicity of analyses, results from similar studies, and other relevant evidence | 13,14 |
| Generalisability         | 21 | Discuss the generalisability (external validity) of the study results                                                                                                      | 14    |
| <b>Other information</b> |    |                                                                                                                                                                            |       |
| Funding                  | 22 | Give the source of funding and the role of the funders for the present study and, if applicable, for the original study on which the present article is based              | 15    |

\*Give information separately for exposed and unexposed groups.

**Note:** An Explanation and Elaboration article discusses each checklist item and gives methodological background and published examples of transparent reporting. The STROBE checklist is best used in conjunction with this article (freely available on the Web sites of PLoS Medicine at <http://www.plosmedicine.org/>, Annals of Internal Medicine at <http://www.annals.org/>, and Epidemiology at <http://www.epidem.com/>). Information on the STROBE Initiative is available at [www.strobe-statement.org](http://www.strobe-statement.org).

# BMJ Open

**Readiness of public health facilities to provide quality maternal and newborn care across the state of Bihar, India: a cross-sectional study of district hospitals and primary health centres**

|                                 |                                                                                                                                                                                                                                                                                                                                                       |
|---------------------------------|-------------------------------------------------------------------------------------------------------------------------------------------------------------------------------------------------------------------------------------------------------------------------------------------------------------------------------------------------------|
| Journal:                        | <i>BMJ Open</i>                                                                                                                                                                                                                                                                                                                                       |
| Manuscript ID                   | bmjopen-2018-028370.R1                                                                                                                                                                                                                                                                                                                                |
| Article Type:                   | Research                                                                                                                                                                                                                                                                                                                                              |
| Date Submitted by the Author:   | 17-Apr-2019                                                                                                                                                                                                                                                                                                                                           |
| Complete List of Authors:       | kaur, Japneet; Oxford Policy Management, Franzen, Samuel; Oxford Policy Management, ; University of Oxford, Centre for Tropical Medicine and Global Health Newton-Lewis, Tom; Oxford Policy Management Murphy, Georgina ; Kenya Medical Research Institute/Wellcome Trust Research Programme, Health Services Unit; Bill and Melinda Gates Foundation |
| <b>Primary Subject Heading</b>: | Health services research                                                                                                                                                                                                                                                                                                                              |
| Secondary Subject Heading:      | Health economics, Health policy                                                                                                                                                                                                                                                                                                                       |
| Keywords:                       | Health & safety < HEALTH SERVICES ADMINISTRATION & MANAGEMENT, Health economics < HEALTH SERVICES ADMINISTRATION & MANAGEMENT, Health policy < HEALTH SERVICES ADMINISTRATION & MANAGEMENT, Quality in health care < HEALTH SERVICES ADMINISTRATION & MANAGEMENT                                                                                      |
|                                 |                                                                                                                                                                                                                                                                                                                                                       |

SCHOLARONE™  
Manuscripts

**Full Title:** Readiness of public health facilities to provide quality maternal and newborn care across the state of Bihar, India: a cross-sectional study of district hospitals and primary health centres

**Short title:** Readiness of health facilities to provide quality maternal and newborn care in Bihar, India

**Authors:** Japneet Kaur\*<sup>1</sup>, Sam Frazen<sup>2</sup>, Tom Newton-Lewis<sup>1</sup>, Georgina A. V. Murphy<sup>1,3</sup>

**Affiliations:**

1. Oxford Policy Management(OPM), Delhi, India
2. Oxford Policy Management(OPM), Oxford, UK
3. Centre for Tropical Medicine and Global Health, University of Oxford, UK

**\*Corresponding author:** Japneet Kaur, Oxford Policy Management, 4/6 First Floor, Siri Fort Institutional Area, New Delhi, India Email: japneetkaur58@gmail.com. Tel: (+91) 011-48081111

**Key words:** neonatal care, maternal care, newborn, infrastructure, newborn mortality, maternal mortality, district hospital, primary health care, audit, staffing, quality of care, Bihar, India

**Abstract**

**Introduction:** Poor access to quality healthcare is one of the most important reasons of high maternal and neonatal mortality in India, particularly in poorer states like Bihar. India has implemented initiatives to promote institutional maternal deliveries. It is important to ensure that health facilities are adequately equipped and staffed to provide quality care for mothers and newborns.

**Methods:** We conducted a cross-sectional study of 190 primary health centres (PHCs) and 36 district hospitals (DHs) across all districts in Bihar to assess the readiness of facilities to provide quality maternal and neonatal care. Infrastructure, equipment and supplies, and staffing were assessed using the WHO service availability and readiness assessment and Indian public health standard (IPHS) guidelines. Additionally, we used household survey data to assess the quality of care reported by mothers delivering at study facilities.

**Results:** PHCs and DHs were found to have 61% and 67% of the mandated structural components to provide maternal and neonatal care, on average, respectively. DHs were, on average, slightly better equipped in terms of infrastructure, equipment and supplies by comparison to PHCs. DHs were found to be inadequately prepared to provide neonatal care. Lack of recommended handwashing stations and bins at both DHs and PHCs suggested low levels of hygiene. Only half of the essential drugs were available in both DHs and PHCs. While no association was revealed between structural capacity and patient-reported quality of care, adequacy of staffing was positively associated with the quality of care in DHs.

**Conclusion:** Examining all DHs and a representative sample of PHCs in Bihar, this study revealed the gaps in structural components that need to be filled to provide quality care to mothers and

1  
2  
3 newborns. Access to quality care is essential if progress in reducing maternal and neonatal  
4 mortality is to be achieved in this high-burden state.  
5

### 6 **Strengths and limitations of this study**

- 7
- 8 • The findings of this study are based on data collected from a single visit to these facilities;  
9 the availability of different equipment and supplies might vary over time.
- 10
- 11 • There is incomplete data in some facilities. Therefore, the number of responses varied  
12 across and within the components of infrastructure, supplies, equipment and staffing.
- 13
- 14 • With respect to household data, women providing information on quality of care were not  
15 representative of those delivering at facilities and the sampling was not proportional to the  
16 number of deliveries at each facility
- 17
- 18 • This study is limited to assessing the structural capacity of the facilities to deliver quality  
19 care as reported by the mothers. However, there could be multiple other components that  
20 influence quality of care (e.g. skills and competencies of health personnel delivering care)  
21 that were not explored in this study.
- 22
- 23 • The study covers all DHs and a large representative sample of PHCs in Bihar. To our  
24 knowledge, no study of this scale has previously been conducted on facility readiness for  
25 maternal and newborn care in Bihar.  
26

### 27 **INTRODUCTION**

28  
29  
30 Progress has been made in reducing maternal and newborn mortality in India over the last three  
31 decades. Between 1990 and 2015, maternal mortality reduced from 556 to 174 per 100,000 live  
32 births and neonatal mortality reduced from 54 to 29 per 1,000 live births.[1–3] However,  
33 considerable further improvements will be needed if India is to reach the Sustainable  
34 Development Goal of reducing maternal mortality to less than 70 per 100,000 births and neonatal  
35 mortality to at least as low as 12 per 1,000 live births by 2030.[4]  
36

37  
38 These goals will be particularly challenging for Bihar, the third most populated state in India  
39 (approximately 104 million). Bihar struggles with persistent poverty (34% of the population lives  
40 below the poverty line) and poor health outcomes (neonatal mortality rate of 27 per 1,000 live  
41 births and maternal mortality rate of 208 per 100,000 live births).[5–7] Only 63% of the pregnant  
42 women deliver in a health facility in Bihar, which is 12% lower than the national average.[8,9] This  
43 is an important area that needs attention since the biggest gains in survival are estimated to be  
44 achieved through facility-based maternal care provided at the time of childbirth and the immediate  
45 postpartum period along with newborn care.[10]  
46

47  
48 In recognition of the importance of facility-based maternal and newborn care, India has  
49 implemented many initiatives to encourage institutional deliveries. The most ambitious of these is  
50 the Janani Suraksha Yojana (JSY) programme offering conditional cash transfers to women of  
51 low socio-economic status for delivering at a health facility.[2] Despite the success of JSY in  
52 increasing institutional deliveries, provision of quality care has been highlighted as an important  
53 barrier for the programme to have the intended effect on health outcomes.[11,12] Addressing the  
54 gaps in facility readiness has been considered as an important factor in improving quality of  
55  
56  
57



1  
2  
3 care.[13] Poor availability of clinical services due to lack of infrastructure has been recognized as  
4 one of the most common bottleneck to providing essential maternal and new born services in  
5 India.[14] Rammohan et al. 2013 report lack of transport facilities for pregnant women as one of  
6 the major bottlenecks to access emergency obstetric care in India.[15] Capacity in terms of  
7 equipment and staff availability needs to be built to detect and manage obstetric emergencies.[16]  
8  
9

10 It is crucial to ensure that facilities are adequately resourced and equipped to deliver essential  
11 maternal and newborn care.[14,17–19] The role of quality factors such as infrastructure,  
12 equipment, supplies and staffing is acknowledged, but little research has been done to quantify  
13 and describe these gaps in detail. This is needed if interventions to strengthen quality are to be  
14 appropriately designed and targeted to be effective.[20]  
15

16  
17 The public health system in India comprises of a three-tier system, namely, primary care at the  
18 village level, secondary care at the sub-district and district levels and tertiary levels of health care  
19 at the regional level. The district hospital (DH) is an essential medium of secondary level of health  
20 care with an objective to provide curative, preventive and promotive health care services to the  
21 people in the district. Linked to every DH are health centres providing primary care, including sub-  
22 divisional hospitals, community health centres (CHCs), primary health centres (PHCs) and sub-  
23 centres. PHCs are crucial to the health system as they form the first point of contact to a qualified  
24 doctor of the public sector for the patients. There are two kinds of PHCs, one is called additional  
25 PHC which mainly does clinical work and the other is block PHC which also exercises  
26 administrative powers in the entire block. Serving a population between 20,000 and 30,000, PHCs  
27 act as a referral unit for six sub-centres and refer out cases to CHCs and higher order facilities.  
28 In Bihar, there are 36 DHs, 70 CHCs, 9729 sub-centres and 1883 PHCs (including 534 block  
29 PHCs).[21]  
30  
31  
32

33 This study aims to (a) assess and highlight structural and staffing gaps in the public health  
34 facilities, specifically, PHCs and DHs in Bihar, that need to be addressed, to deliver quality  
35 maternal and newborn services (b) understand the relationship between structural and process  
36 quality metrics for maternal and newborn health services. This study is based on the data  
37 collected in the baseline assessment of Bihar Technical Support Programme (BTSP). BTSP is a  
38 large multi-year programme funded by the Bill and Melinda Gates Foundation and implemented  
39 by CARE India with OPM as monitoring and evaluation partner.[22] Working closely with  
40 Government of Bihar's Departments of Health and Family Welfare and Social Welfare, CARE  
41 India's interventions aim to strengthen the health system and improve the quality of care to  
42 improve reproductive, maternal, newborn, child, adolescent and nutrition (RMNCH+N) outcomes.  
43  
44  
45

## 46 **METHODS**

47  
48 We conducted a cross-sectional study of health facilities in Bihar during July-October 2016.  
49 Facility surveys were conducted in block (sub-district) and district level government-run public  
50 health facilities. This study also uses household maternal and child health survey data collected  
51 during October-December 2016 by CARE India.  
52

### 53 **Study population and sampling**

1  
2  
3 There are 36 district hospitals in Bihar, all of which were invited to participate in the facility  
4 survey. There are 534 blocks (sub-districts) in Bihar, 190 of which were sampled for the facility  
5 survey. The number of blocks vary widely per district. Hence, blocks were sampled  
6 proportionally according to the total number of blocks per district. The selected sample had  
7 blocks ranging from 1 to 9 per district with a median of 6 blocks. Each block contains one block  
8 PHC, all of which (from the 190 sampled blocks) were included in the facility survey.  
9  
10

11 Household survey data were collected using five different questionnaires for mothers who had a  
12 child belonging to the following five age groups: i) 0-2; ii) 3-5; iii) 6-8; iv) 9-11; and v) 12-23  
13 months old. A mixed sampling methodology of population based-estimation and lot quality  
14 assurance sampling (LQAS) (a small sample survey design based on binomial distribution) was  
15 used [23]. The sampling 'lots' in this survey were the blocks/sub-districts. All 534 blocks in 38  
16 districts were included in the study data collection. The number of Anganwadi Centers (AWC,  
17 village level institutions providing basic health care services) sampled from each block was  
18 determined using proportional allocation, however if this resulted in a sample of less than 19  
19 AWCs, then 19 AWCs were sampled in order to meet a minimum sample threshold per block.  
20 The sampled AWC were selected within each block using simple random sampling. Five  
21 households per AWC were selected, with one each from mother of following five age groups- (a)  
22 0-2 (b) 3-5 (c) 6-8 (d) 9-11 (e) 12-23. In total, 15667 AWCs were selected ranging from 19 to  
23 123 per block.  
24  
25  
26

27 Within each sampled AWC catchment area, households were identified through systematic  
28 sampling.[23] Briefly, an index household was chosen within each AWC catchment area using a  
29 random number table. Starting with the index household, data collectors visited every fifth  
30 household looking for eligible mothers. This approach aimed to obtain a wide distribution of  
31 households (minimizing the effect of clustering), while remaining feasible and practical for data  
32 collection purposes. The pilot phase of the study did not observe any significant differences in  
33 household characteristics when alternative sample intervals of 10<sup>th</sup>, 15<sup>th</sup>, and 20<sup>th</sup> households  
34 were selected. The data collectors continued moving in a circular manner, following the 'right-  
35 hand rule', until five eligible households had been interviewed per AWC catchment area, one  
36 household for each age group questionnaire.  
37  
38

39 To reduce the recall bias, data on quality care presented in the analysis were restricted to mothers  
40 with children aged between 0-2 months. Of the mothers who also delivered at the DHs or PHCs  
41 that were covered in the facility survey (ranging from 1 to 17 mother per facility) were included in  
42 this analysis.  
43  
44

## 45 **Data collection**

### 46 **Facility survey**

47  
48 Data were collected using a standardised structured survey tool designed based on the Service  
49 Availability and Readiness Assessment (SARA) tool developed by the World Health Organisation  
50 (WHO) and the United States Agency for International Development.[24] The tool was modified  
51 for the Indian context using the Indian Public Health Standards (IPHS) guidelines.[25,26] To  
52 evaluate the structural capacity of the facility, the availability and condition of infrastructure,  
53 equipment, and supplies in different departments, including the labour room, New Born Care  
54 Corner (NBCC), immunization room, laboratory, operation theatre, drug store, and data operation  
55  
56  
57  
58  
59  
60

1  
2  
3 were assessed. Information on infrastructure and equipment was collected through interviews  
4 with the facility-in-charge and staff nurse as well as through direct observation. The pharmacist  
5 or drug store-in-charge was interviewed, and the responses were validated through the drug  
6 register to collect information on supplies availability.  
7

8  
9 The Medical Officer in Charge (MOIC) at the PHCs and Hospital Manager at the DHs were also  
10 interviewed to obtain information on the number of health personnel employed at the facilities and  
11 the number of personnel that were sanctioned (number of staff expected to be employed) to the  
12 facilities for each of the health cadres, including medical officers (MOs), staff nurses, auxiliary  
13 nurse midwifery (ANMs), laboratory technicians, and pharmacists. This information was also  
14 cross-checked with the facility registers.  
15

16  
17 Availability of 30 services related to family planning, safe delivery, antenatal care, and neonatal  
18 and child care was assessed and the reasons for unavailability were asked from the MOIC in  
19 PHCs and the Hospital Manager in DHs.  
20

21  
22 Three pilot tests were conducted in the facilities outside the study sample to refine the survey tool  
23 and to train the enumeration team. The survey was conducted by 60 enumerators over the four  
24 month period. Enumerators all had prior experience in conducting facility surveys and received  
25 further training over 10 days on using the study tool and conducting this survey.  
26

27  
28 Periodic data checks for completeness and outliers were conducted by a data management team  
29 in Patna, Bihar. Where information was missing due to absenteeism or lack of time provided by  
30 the respondent, a second visit to those facilities was organized.  
31

### 32 LQAS Household survey

33  
34 One-to-one interviews were conducted with consenting and eligible mothers by trained data  
35 collectors, using a standardised questionnaire and following standard operating procedures.  
36 Information collected from mothers and of interest to this study included the household  
37 characteristics, the place of delivery, and care received at the place of delivery.  
38

### 39 Patient and Public involvement

40  
41 Patients were not involved in the study.  
42

## 43 Data Analysis

44  
45 Data analysis was conducted using Stata version 13 (Stata Corporation, USA). The current status  
46 of the facilities was assessed on three broad parameters, namely, the structural capacity, staffing,  
47 and the quality of care provided at the facilities.  
48

### 49 Structural Capacity

50  
51 The structural capacity of the facilities was assessed by computing readiness scores of 0-1 for  
52 infrastructure, equipment and supplies. "Infrastructure readiness" included the availability as well  
53 as the condition of different components, wherever applicable. For equipment, "readiness" implied  
54 the availability as well as functionality of the equipment and for supplies, readiness was defined  
55 by availability.[24]  
56  
57

1  
2  
3 Infrastructure readiness of the facilities included nine broad components (such as power, water,  
4 transport, handwashing stations) at the PHCs.[24] An additional three components (availability of  
5 different rooms, computer and internet, and blood bank) were assessed for DH infrastructure  
6 score (details of components are listed in **appendix table S1**).

7  
8  
9 The equipment readiness of the facilities was assessed by scoring the availability and functionality  
10 of 48 essential (according to IPHS guidelines) maternal and newborn health equipment (items  
11 listed in **appendix table S2**). A score of 1 was assigned if the equipment was observed to be  
12 available and in a functional state. In case of unavailability or available but not functional  
13 equipment, a score of 0 was assigned. Similarly, supplies readiness was assessed by considering  
14 the availability of 76 essential maternal and child health drugs that were expected at the facilities  
15 as per the IPHS guidelines (listed in **appendix table S3**). The mean across the three components  
16 of infrastructure, equipment and supplies was computed to generate a score for structural  
17 capacity ranging from 0 to 1 per facility. The mean across facilities was computed to get an overall  
18 score for structural capacity. Detailed methods of scoring have been provided in **the appendix**.

## 21 Staffing Index

22  
23 We assessed the availability of human resources by computing the ratio of filled to sanctioned  
24 positions, as reported by the MOIC and the Hospital Manager or equivalent authority in charge in  
25 the PHCs and DHs, for each health cadre in each facility. The ratio of total filled to total sanctioned  
26 positions for permanent staff, combining all cadres, was computed to generate an overall staffing  
27 index for each facility.  
28

29  
30 The availability of health staff was also compared with the essential requirements mandated by  
31 IPHS guidelines. In PHCs, we considered staff requirement based on the monthly delivery load  
32 of more than 20, as provided by the IPHS guidelines.[25] In DHs, the staff requirement based on  
33 the bed strength were rounded down to compare with the mandated guidelines.[26] For instance,  
34 for DHs with less than or equal to 200 beds, we considered the staff requirements for 100 beds  
35 as defined by IPHS guidelines. For ANMs, the IPHS requirement of 0.45 staff per bed was  
36 considered. (**appendix table S4**).

37  
38  
39 The relationship between availability of services (that were unavailable in at least 10% of the  
40 PHCs and DHs) and structural capacity and staffing index was explored by assessing the pairwise  
41 correlation coefficients between the indices at the facility.  
42

## 43 Quality of care

44  
45 Our primary aim was to describe the structural readiness of facilities to provide essential maternal  
46 and new-born services. We also conducted analyses of household survey data to explore the  
47 quality of care at facilities as reported by women who both participated in the household survey  
48 and delivered at study facilities.  
49

50  
51 Each mother was asked 11 questions during the household survey pertaining to the treatment  
52 and care that they and their newborns received during delivery. Each question was assigned a  
53 score of 0 (not performed/don't know) or 1 (performed). Household survey data was merged with  
54 facility data by matching the names of facilities where mothers delivered with the facility names  
55 collected during facility assessment survey. A quality of care index for each PHC and DH was  
56  
57

generated by taking the average score of the 11 questions for all those household survey participants who delivered within the facility. All data were assessed at the facility level.

The relationship between structural capacity, staffing, and quality of care indexes were visually explored using scatter plots and trend lines as part of this exploratory analysis.

### **Ethics and permission**

Ethical approval was granted by the Indian Institutional Review Board. At each facility, the purpose of the study was explained and informed consent was obtained from the MOIC and the Hospital Manager or equivalent authority in charge in the PHCs and DHs, respectively. For the household survey, ethics approval was obtained from Ashirwad Ethics Committee, Ashirwad Hospital and Research Center, Ulhasnagar, India and informed consent was taken from the mothers

## **RESULTS**

The number of facilities assessed for each component of structural capacity and staff availability varied (range: 35-36 DHs and 166-190 PHCs) due to missing data and depending on the availability of respondents during the time of the survey (**appendix table S5**). Household survey data were available from 671 mothers who delivered in 107 of the 190 study PHCs and 1419 mothers who delivered in across all 36 study DHs.

### **Facility characteristics**

Most PHCs (95%) were functional for 24 hours per day, but 40% of them were not accessible throughout the year. A dedicated labour room, maternity ward, operation theatre and store room was found to be available in most PHCs (94%, 96%, 89% and 96% respectively); an immunisation room was available in only 76% of the PHCs. While the IPHS guidelines recommend each PHC to have six beds, the number of sanctioned and available beds, as reported by the MOIC, varied. Eight PHCs reported having no beds, four of which nonetheless conducted maternal deliveries.

All DHs were found to have a dedicated labour room and maternity ward, but specialised units for antenatal care and for post-natal care were available in only 69% and 56% of the DHs, respectively. As per the IPHS guidelines, every DH should have a provision for Special New Born Care units (SNCUs); however, this unit was found in only 21 of the 36 DHs (58%). In DHs, the number of beds recommended by IPHS guidelines varies between 75 to 500 depending on the size, terrain, and population of the district; however, in Bihar, we identified four DHs with fewer than 75 beds available.

### **Availability of services**

Of the 30 services assessed in 36 DHs and 189 PHCs, seven (23%) and 12 (40%) services were unavailable in at least 10% of the facilities, respectively. Most of the commonly unavailable services were related to family planning including medical termination of pregnancy (MTP), non-scalpel vasectomy, conventional vasectomy, and laparoscopic sterilization. Venereal disease research laboratory (VDRL) tests conducted during ANC visits were unavailable in 17% and 30% of the DHs and PHCs, respectively (**figure 1**).

1  
2  
3 For both PHCs and DHs, the main reason for the lack of these services was reported to be lack  
4 of required human resources (**figure 1** and **appendix table S6**). In PHCs, lack of equipment was  
5 reported to be the second most important factor for the unavailability of services such as MTP,  
6 non-scalpel vasectomy and laparoscopic sterilization. Lack of equipment was also the reason for  
7 unavailability of laparoscopic sterilization in 47% of the 36 DHs.  
8  
9

## 10 **Structural capacity**

11  
12 Overall, the average structural capacity across PHCs was 60% (range: 35-83%) and 66% (range:  
13 51-82%) across DHs. DHs were slightly better equipped on average in terms of availability of  
14 infrastructure, equipment and drug supplies (78%, 70%, 53%, respectively) compared with PHCs  
15 (63%, 65%, and 50%, respectively). Results varied greatly between facilities, particularly among  
16 PHCs (**figure 2**).  
17

### 18 **Infrastructure**

19  
20 Infrastructure score at the DHs and PHCs varied with a range of 60-92% and 32-90%,  
21 respectively. Of the 12 items assessed in DHs, five (hand washing station in the labour room,  
22 telephone connection, water, power and transport) had an average readiness score of greater  
23 than 90%. In PHCs, telephone connection was the only component with an average readiness  
24 score of over 90% across facilities. Readiness was particularly low with respect to hand washing  
25 stations in the immunisation room and laboratory in both DHs and PHCs (**appendix table S7**).  
26  
27

28  
29 Of all the items assessed in the labour room, the availability of different colour coded bins to  
30 segregate waste into infectious and non-infectious sources was the lowest in both PHCs and DHs  
31 (54% and 63%, respectively). Emergency transport for referrals was available in only 66% of the  
32 PHCs, whereas the DHs performed well in this regard with all DHs having emergency transport  
33 available for referrals.  
34

### 35 **Equipment and supplies**

36  
37 Equipment score at the DHs ranged between 54% and 92%; the corresponding range at PHCs  
38 was 40-90%. Neonatal stethoscope and MTP suction were the two most commonly missing items  
39 of equipment in PHCs; whereas, in DHs, infantometer and nebulizer were the two most commonly  
40 missing items (**appendix table S7**). In the labour room specifically, light examination, feeding  
41 tube and oxygen cylinder were the most commonly missing items of equipment in both the DHs  
42 and PHCs.  
43  
44

45  
46 Availability of drugs was the weakest performing area of structural assessment for both DHs and  
47 PHCs (**figure 1**), with only half (50% and 52% on average, respectively) of the essential drugs  
48 (n=76) being available. Drug score varied with a range of 25-100% across DHs and 14-82%  
49 across PHCs. Of 25 essential drugs that should be available in the labour room as per the IPHS  
50 guidelines, 62% and 72% were available on average in PHCs and DHs, respectively. Carboprost,  
51 hydralazine and methyldopa were the least commonly available of the drugs in both the PHCs  
52 and DHs.  
53  
54  
55  
56  
57

## Staff availability

The overall average staffing index was 69% (range: 11-100%) in PHCs, indicating 31% of health worker sanctioned positions, as reported by the MOIC, being unfilled. The average staffing index at PHCs was found to be the highest for the ANMs, indicating a high proportion of sanctioned positions being filled (**table 1**). However, the requirement of ANMs, as mandated by the IPHS guidelines, was fulfilled in only 42% of the PHCs (**table 1**). The mandate of having at least one MO at a PHC was fulfilled at all PHCs. However, the sanctioned positions, as reported by the MOIC, varied and the average staffing index of available to sanctioned MOs was 70% for contractual (n =129) and 68% for permanent staff. The proportion of positions filled in PHCs was the lowest for laboratory technicians (27%). These technicians were, however, supplemented by contractual workers, for whom 92% of sanctioned positions were filled. RMNCH+ counsellors were available in only four PHCs (2%) and family planning counsellors in six PHCs (3%). None of the PHCs had an infant and young child feeding counsellor.

In DHs, the overall staffing index for three cadres was 55% (range 24-100%). The staffing index amongst the health personnel in DHs was found to be similar to PHCs (**table 1**); the staffing index was also highest for ANMs (78%) and lowest (35%) for laboratory technicians in DHs. For ANMs, the IPHS requirement of 0.45 staff per bed was fulfilled in only 15% of the DHs (**table 1**). The average staffing index for MOs was 52% and the requirement of essential MOs as per the IPHS guidelines was fulfilled in 53% of the DHs. Nearly 60% of the DHs had less than half of the sanctioned positions for MOs and nurses filled.

**Table 1:** Average filled/sanctioned positions for staff and IPHS requirement fulfillment for district hospitals (DHs) and primary health centres (PHCs)

| Designation             | Average filled to sanctioned- DHs | Average filled to sanctioned- PHCs | % DHs fulfilling IPHS requirements | % PHCs fulfilling IPHS requirements |
|-------------------------|-----------------------------------|------------------------------------|------------------------------------|-------------------------------------|
| Medical officer         | 52% (34)                          | 68% (190)                          | 53% (34)                           | 100% (190)                          |
| Staff Nurse             | 44% (33)                          | 42% (48)                           |                                    | -                                   |
| Auxiliary nurse midwife | 78% (24)                          | 81% (173)                          | 15% (33)*                          | 42% (173)                           |
| Laboratory technician   | 35% (32)                          | 27% (148)                          | 0% (32)                            | 27% (148)                           |
| Compounder/pharmacist   | 56% (32)                          | 63% (171)                          | 16% (32)                           | 70% (171)                           |
| Store keeper            | 58% (28)                          | 57% (101)                          | 61% (28)                           | 57% (101)                           |

*Only permanent positions are considered. Cases where information on sanctioned positions was missing were excluded. Medical officers include physicians, obstetricians, paediatricians and anaesthetists. PHC IPHS guidelines mention to appoint at least 4 Nurse- Midwives. We consider at least 4 ANMs for each facility since the information for Staff Nurse is unavailable for most facilities. \*DH IPHS guidelines mention the requirement for staff nurse/ANM combined and hence we consider the combined availability of staff nurse and ANM*

## Relationship between service availability indexes

In PHCs, all three components of structural capacity index, including infrastructure, equipment and supplies, had significantly positive correlation with the availability of the 12 services at 5% level of significance. For DHs, availability of seven services that were unavailable in at least 10% DHs, had positive correlation with equipment, supplies and staffing index at 5% level of significance.

## Reported quality of care

When asked if 11 essential pre- and post-partum services had been carried out, the responses were similar between DHs and PHCs (**table 2**). Almost all mothers reported that hygiene and newborn warmth practices of wearing gloves, wiping the baby dry and wrapping the baby were being practiced in both PHCs and DHs. Provision of skin-to-skin contact was reported by fewer than half of women, regardless of facility type. Measuring blood pressure and advising mothers about their and their baby's health before discharge were received by less than 30% of the mothers.

**Table 2:** Quality of care reported by mothers delivering at the primary health centres (PHCs) and district hospitals (DHs)

| Quality of Care                                                                                                       | PHCs (n =671) |        |            | DHs (n = 1419) |        |            |
|-----------------------------------------------------------------------------------------------------------------------|---------------|--------|------------|----------------|--------|------------|
|                                                                                                                       | Yes           | No     | Don't Know | Yes            | No     | Don't Know |
| Was the baby wrapped in a clean cloth after birth?                                                                    | 97.91%        | 1.34%  | 0.75%      | 96.41%         | 1.20%  | 2.40%      |
| Did this person wear gloves before conducting your delivery?                                                          | 96.87%        | 1.64%  | 1.49%      | 95.49%         | 1.20%  | 3.31%      |
| Was the baby wiped dry after delivery?                                                                                | 95.68%        | 2.53%  | 1.79%      | 93.31%         | 2.47%  | 4.23%      |
| Was the baby weighed after delivery?                                                                                  | 92.55%        | 3.73%  | 3.73%      | 88.94%         | 5.64%  | 5.43%      |
| After delivery, was nothing applied to the cord?                                                                      | 91.36%        | 8.67%  | 0%         | 85.27%         | 14.73% | 0%         |
| Did the person wash hands with soap before conducting your delivery?                                                  | 76.15%        | 3.73%  | 20.12%     | 73.50%         | 5.14%  | 21.35%     |
| Was the baby placed on the mother's abdomen immediately after birth?                                                  | 49.78%        | 42.92% | 7.30%      | 40.03%         | 48.98% | 10.99%     |
| Were you advised by the nurse or anyone else to keep the baby naked on your chest, next to your skin?                 | 35.77%        | 63.49% | 0.75%      | 23.82%         | 75.26% | 0.92%      |
| Did you breastfeed your baby immediately after delivery?                                                              | 24.29%        | 75.71% | 0%         | 21.17%         | 78.48% | 0.24%      |
| Was any advice given to you regarding your health or your baby's health before you were discharged from the facility? | 29.06%        | 70.94% | 0%         | 18.60%         | 81.40% | 0%         |
| Was blood pressure measured after delivery, before discharge?                                                         | 9.99%         | 90.91% | 0%         | 8.67%          | 91.33% | 0%         |



## Relationship between quality indexes

No clear relationship between the facility structural capacity index (composite score for infrastructure, equipment, and drugs), the staffing index (ratio of sanctioned to filled positions), or the quality of care index (average score for 11 facility-based care services among women per facility) was found for PHCs. In DHs, no clear trend was observed between the structural capacity index and quality of care as well as staffing and structural capacity index. However, a positive relationship between the quality of care index and staffing index was evident (**figure 3**).

## DISCUSSION

This study provides evidence from all DHs and a large representative sample of block PHCs in Bihar, describing the gaps that need to be addressed to improve the provision of facility-based maternal and newborn care. Gaps in the structural capacity of facilities to provide quality care in terms of basic infrastructure, availability of equipment and supplies, and appropriate staffing were identified. These are areas that will require coordinated and dedicated efforts if much needed gains are to be made towards improved quality of facility-based maternal and neonatal care.

The results revealed that DHs, on average, were better in terms of staffing and structural capacity in comparison with PHCs. However, the reported quality of care was better in PHCs than the DHs. DHs, being the referral points for PHCs, often need to address complicated cases and are therefore recommended to have higher staffing and structural capacity in comparison to PHCs. However, the quality of care provided at DHs and PHCs would also depend on other factors including the case load and type of cases.

The trends within the structural capacity were very similar in both the district and block facilities with availability of supplies being the lowest amongst the components of structural capacity. It is particularly concerning that DHs are missing drugs to control blood pressure and treat haemorrhage since they are supposed to deal with women who are at risk of complications.

Maintenance of hygiene is extremely important in clinical areas such as labour rooms with patients at high risk of acquiring infections. However, assessment of infrastructure readiness revealed a low level of hygiene and sanitation practices in the facilities. The study identified lack of recommended handwashing stations in different rooms and colour coded bins in the labour room. The establishment of a system of accreditation and regular monitoring of quality of hygienic care, among other interventions, may help to ensure that the facilities have the essential equipment and infrastructure in place.

The most commonly missing equipment in the DHs and PHCs were mostly pertaining to neonatal care. Access to basic neonatal care is essential to reduce neonatal mortality because between a quarter and half of all neonatal deaths happen within 24hrs of life and 75% of neonatal deaths arise in the first week of life.[27] Pre-term birth, severe infections and asphyxia have been globally identified as the main direct causes of neonatal death. Low birth weight has also been recognized as an important cause of death.[27] Low-cost interventions including tetanus toxoid vaccination, exclusive breastfeeding, kangaroo mother care for low birthweight infants, and antibiotics for neonatal infections can reduce mortality.[28] However, our study revealed that skin to skin care was only being practiced by 36% of the mothers in PHCs and 24% of the mothers in DHs across Bihar. Immediate breastfeeding practice was also reported by only 24% of the mothers in PHCs

1  
2  
3 and 21% mothers DHs. These findings suggest that these facilities are not ready to provide quality  
4 neonatal care and are missing simple but vital life-saving interventions.  
5

6 Availability of skilled human resources is another important aspect to provide quality maternal and  
7 newborn care. The data on sanctioned posts, as reported by the facility in charge, were found to  
8 be different from those recommended by IPHS guidelines. This gap between the guidelines and  
9 actual sanctioned posts reflects the lack of translation of policies into practice. In PHCs, while the  
10 essential requirement for MOs was fulfilled in all facilities, the filled to sanctioned ratio was only  
11 68%, indicating the need for more MOs in these facilities. In DHs, the IPHS requirement of staff  
12 nurse/ANM was fulfilled in only 15% of the facilities. In addition, lack of staff was reported as the  
13 main reason for the unavailability of services. Our results specifically indicated a lack of  
14 counsellors at both the block and district facilities. This may have contributed to less than 30%  
15 mothers reporting having received advice about their and their baby's health before discharge.  
16 The positive relationship found between the staffing and quality of care (as reported by mothers)  
17 at the DHs affirms the need to address the gaps in staffing to provide better quality of care.  
18  
19

20 Both DHs and PHCs are particularly important platforms under the health system, with DHs being  
21 the secondary referral level responsible for providing basic specialty services and PHCs being  
22 the first point of contact to a qualified doctor in the public health sector in rural areas. Given that  
23 the PHCs are not equipped to manage complicated cases, including caesarean sections or  
24 provide facilities of SNCU, it is important to have a well-functioning transport system for referrals.  
25 Our findings revealed that 34% of the PHCs did not have an emergency transport for referrals.  
26 While the Government of India recommends the provision of referral system at the facilities, no  
27 systematic step has been taken in this direction so far.[26,29] Lack of skilled staff, inadequate  
28 infrastructure and lack of accountability have been recognized as some of the key reasons for the  
29 failure of referral systems in India.[30]  
30  
31

32 This study has both strengths and limitations. The study draws on data from a large number of  
33 facilities, covering all DHs and a large representative sample of PHCs in Bihar. To our knowledge,  
34 no study of this scale has previously been conducted on facility readiness for maternal and  
35 newborn care in Bihar. The findings of this study are, however, based on data collected from a  
36 single visit to these facilities; the availability of different equipment and supplies might vary over  
37 time. The number of responses varied across and within the components of infrastructure,  
38 supplies, equipment and staffing, leading to incomplete data in some facilities. With respect to  
39 household data, women providing information on quality of care were not representative of those  
40 delivering at facilities and the sampling was not proportional to the number of deliveries at each  
41 facility. Hence, findings on quality of care at facilities as reported in the household survey should  
42 be treated as exploratory findings only. The scope of this study is limited to assessing the  
43 structural capacity of the facilities to deliver quality care and the care as reported by the mothers.  
44 However, there could be multiple other components that influence quality of care (e.g. skills and  
45 competencies of health personnel delivering care) that were not explored in this study.  
46  
47  
48  
49

## 50 CONCLUSION

51  
52 Presence of well-functioning facilities, with required structural and staffing capacity, is crucial for  
53 providing maternal and newborn care that translates to better maternal and child outcome. Being  
54 a highly populated state with poor health outcomes, the state of Bihar requires particular attention  
55 if India is to achieve the sustainable development goals targets for maternal and newborn health.  
56  
57

1  
2  
3 This study provides a description of the current capacity of public facilities in Bihar to provide  
4 quality maternal and neonatal care, unearthing particular gaps in neonatal equipment,  
5 infrastructure required to maintain hygiene, and staffing capacity at the facilities. Lack of  
6 correlation between structural capacity and staffing, and structural capacity and quality of care  
7 suggests presence of heterogeneity in the strengths and weaknesses across the facilities. A  
8 better understanding is needed to assess the cause of this variation which could help design  
9 tailored and appropriate interventions at these facilities to improve quality of care. This study lays  
10 the foundation for ongoing studies in Bihar to explore the relationship between quality of care and  
11 health outcomes. Increased focus on effective coverage and quality of facility-based care for  
12 mothers and newborns is needed if necessary gains are going to be made in saving lives in this  
13 high-burden setting.  
14  
15

### 16 17 18 **Acknowledgements**

19  
20 The authors thank Sneha Lamba, Rakesh Chandra, Madhavi Misra, Tanmay Mahapatra and the  
21 entire field Team of OPM for their contribution to this manuscript.  
22  
23

### 24 25 **Contributor ship Statement**

26  
27 T.NL. and S.F. conceived the idea for the manuscript. J.K. managed the data collection and  
28 supervised the data cleaning. J.K. led the data analysis and wrote the manuscript with the support  
29 of G.M. J.K. and G.M. jointly interpreted the data. G.M. supervised and edited the manuscript.  
30 Both T.NL. and S.F. reviewed the paper. All authors were involved in the interpretation of data,  
31 critically reviewed the manuscript and approved the final version.  
32  
33  
34  
35

### 36 37 **Competing Interests**

38  
39 None declared.  
40  
41

### 42 43 **Funding**

44 This study was supported by Bill and Melinda Gates Foundation.  
45  
46

### 47 48 **Data sharing Statement**

49 Data used for this manuscript will be made available on request.  
50  
51  
52  
53  
54  
55  
56  
57

## References

1. WHO, UNICEF, UNFPA, World Bank Group and UNPD. Maternal mortality in 1990-2015. 2015.
2. Lim SS, Dandona L, Hoisington JA, James SL, Hogan MC, Gakidou E. India's Janani Suraksha Yojana, a conditional cash transfer programme to increase births in health facilities: an impact evaluation. *Lancet* [Internet]. 2010;375(9730):2009–23. Available from: [http://dx.doi.org/10.1016/S0140-6736\(10\)60744-1](http://dx.doi.org/10.1016/S0140-6736(10)60744-1)
3. Wang H, Bhutta ZA, Coates MM, Coggeshall M, Dandona L, Diallo K, et al. Global, regional, national, and selected subnational levels of stillbirths, neonatal, infant, and under-5 mortality, 1980–2015: a systematic analysis for the Global Burden of Disease Study 2015. *Lancet*. 2016;388(10053):1725–74.
4. Sustainable Development Knowledge Platform.
5. Government of India Planning Commission. Press note on poverty estimates, 2011-12. Press Information Bureau. 2013.
6. Gol. Sample Registration System Statistical Report 2016. 2017.
7. Gol. Sample Registration System Statistical Report 2012 [Internet]. New Delhi; 2013. Available from: [http://www.censusindia.gov.in/vital\\_statistics/SRS\\_Reports\\_2012.html](http://www.censusindia.gov.in/vital_statistics/SRS_Reports_2012.html)
8. National Family Health Survey - 4. 2015;
9. International Institute for Population Sciences. State Fact Sheet Bihar [Internet]. National Family Health Survey-4. 2015. Available from: [http://rchiips.org/NFHS/pdf/NFHS4/BR\\_FactSheet.pdf](http://rchiips.org/NFHS/pdf/NFHS4/BR_FactSheet.pdf)
10. Bhutta ZA, Das JK, Bahl R, Lawn JE, Salam RA, Paul VK, et al. Can available interventions end preventable deaths in mothers, newborn babies, and stillbirths, and at what cost? *Lancet*. 2014;384(9940):347–70.
11. Das A, Rao D, Hagopian A. India's Janani Suraksha Yojana: Further review needed. Vol. 377, *The Lancet*. 2011. p. 295–6.
12. Gita G, Bharti S, Shashi K, Arvind K. Trends in maternal mortality and impact of janani suraksha yojana (JSY) on maternal mortality ratio in a tertiary referral hospital. *J Obstet Gynecol India*. 2012;62(3):307–11.
13. Jayanna K, Mony P, Ramesh BM, Thomas A, Gaikwad A, Mohan HL, et al. Assessment of facility readiness and provider preparedness for dealing with postpartum haemorrhage and pre-eclampsia/eclampsia in public and private health facilities of northern Karnataka, India: A cross-sectional study. *BMC Pregnancy Childbirth*. 2014;14(1).
14. Dickson KE, Simen-Kapeu A, Kinney M V., Huicho L, Vesel L, Lackritz E, et al. Every Newborn: Health-systems bottlenecks and strategies to accelerate scale-up in countries. Vol. 384, *The Lancet*. 2014. p. 438–54.
15. Rammohan A, Iqbal K, Awofeso N. Reducing Neonatal Mortality in India: Critical Role of Access to Emergency Obstetric Care. *PLoS One*. 2013;8(3).
16. Ramarao S. Safer maternal health in rural Uttar Pradesh: do primary health services

- 1  
2  
3 contribute? Health Policy Plan. 2002;16(3):256–63.  
4
- 5 17. Moxon SG, Lawn JE, Dickson KE, Simen-Kapeu A, Gupta G, Deorari A, et al. Inpatient  
6 care of small and sick newborns: A multi-country analysis of health system bottlenecks  
7 and potential solutions. BMC Pregnancy Childbirth. 2015;15.  
8
- 9 18. Sharma G, Mathai M, Dickson KE, Weeks A, Hofmeyr GJ, Lavender T, et al. Quality care  
10 during labour and birth : a multi- country analysis of health system bottlenecks and  
11 potential solutions. BMC Pregnancy Childbirth [Internet]. 2015;15(Suppl 2):S2. Available  
12 from: <http://www.biomedcentral.com/1471-2393/15/S2/S2>  
13
- 14 19. WHO. Standards for Improving Quality of Maternal and Newborn Care in Health Facilities  
15 [Internet]. Who. 2016. Available from:  
16 <http://apps.who.int/iris/bitstream/10665/249155/1/9789241511216-eng.pdf?ua=1>  
17
- 18 20. Chaturvedi S, De Costa A, Raven J. Does the Janani Suraksha Yojana cash transfer  
19 programme to promote facility births in India ensure skilled birth attendance? A qualitative  
20 study of intrapartum care in Madhya Pradesh. Glob Health Action. 2015;8(1).  
21
- 22 21. Ministry of Health and Family Welfare, GoI. Rural Health Statistics, 2014-15. 2015.  
23
- 24 22. CARE. Bihar Technical Support Programme - CARE India [Internet]. 2017. Available  
25 from: [https://www.careindia.org/project/technical-assistance-to-the-government-of-bihar-](https://www.careindia.org/project/technical-assistance-to-the-government-of-bihar-improving-health-nutrition-coverage-and-outcomes/)  
26 [improving-health-nutrition-coverage-and-outcomes/](https://www.careindia.org/project/technical-assistance-to-the-government-of-bihar-improving-health-nutrition-coverage-and-outcomes/)  
27
- 28 23. Das A, Chatterjee R, Karthick M, Mahapatra T, Chaudhuri I. The influence of seasonality  
29 and community-based health worker provided counselling on exclusive breastfeeding -  
30 Findings from a cross-sectional survey in India. Vol. 11, PLoS ONE. 2016.  
31
- 32 24. WHO. Service Availability and Readiness Assessment (SARA) [Internet]. World Health  
33 Organisation (WHO). 2016. Available from:  
34 [http://www.who.int/healthinfo/systems/sara\\_indicators\\_questionnaire/en/](http://www.who.int/healthinfo/systems/sara_indicators_questionnaire/en/)  
35
- 36 25. Services DG of H, India M of H& FWG of. Indian Public Health Standards (Iphs)  
37 Guidelines for Primary Health Centres Revised 2012 [Internet]. Directorate General of  
38 Health Services Ministry of Health & Family Welfare Government of India. 2012. Available  
39 from: <http://health.bih.nic.in/Docs/Guidelines/Guidelines-PHC-2012.pdf>  
40
- 41 26. Ministry of Health & Family Welfare. Indian Public Health Standards (IPHS) Guidelines for  
42 District Hospitals (101 to 500 Bedded [Internet]. 2012. Available from:  
43 [http://nrhm.gov.in/images/pdf/guidelines/iphs/iphs-revised-guidlines-2012/district-](http://nrhm.gov.in/images/pdf/guidelines/iphs/iphs-revised-guidlines-2012/district-hospital.pdf)  
44 [hospital.pdf](http://nrhm.gov.in/images/pdf/guidelines/iphs/iphs-revised-guidlines-2012/district-hospital.pdf)  
45
- 46 27. Lawn JE, Cousens S, Zupan J. 4 Million neonatal deaths: When? Where? Why? Vol. 365,  
47 Lancet. 2005. p. 891–900.  
48
- 49 28. Martines J, Paul VK, Bhutta ZA, Koblinsky M, Soucat A, Walker N, et al. Neonatal  
50 survival: A call for action. Vol. 365, Lancet. 2005. p. 1189–97.  
51
- 52 29. Vora KS, Mavalankar D V., Ramani K V., Upadhyaya M, Sharma B, Iyengar S, et al.  
53 Maternal health situation in India: A case study. J Heal Popul Nutr. 2009;27(2):184–201.  
54
- 55 30. Anil Kumar Gupta, Shweta Talati, Sudip Bhattacharya AS. Health System Strengthening-  
56 Focussing on Referrals: An Analysis from India. JOJ Nurs Heal care. 2017;2(4).  
57  
58  
59  
60

## Figure Legends

**Figure 1:** Reasons for unavailability of services in (A) primary health centres (PHCs) and (B) district hospitals (DHs). Multiple answers were allowed. Figures in parentheses of x axis report the total unavailability. Abbreviations: MTP: Medical termination of pregnancy; ECP: Emergency contraceptive pill; VDRL: Venereal Disease Research Laboratory; PPIUCD: Postpartum Intrauterine Contraceptive Device; ANC: Ante natal care

**Figure 2:** Structural readiness scores across district hospitals (DHs) and primary health centres (PHCs). Scores are presented as box plots representing the median and interquartile range (box and whiskers, respectively) and outliers (dots).

**Figure 3:** Structural capacity, staffing and quality of care relationship for primary health centres (blue) and district hospitals (orange). Each point represents the indexes for each facility (PHC or DH). The trend line shows the relationship between the staffing and quality of care across the PHCs (blue) and DHs (orange). Note that axis scales vary.

Figure 1: Reasons for unavailability of services in (A) primary health centres (PHCs) and (B) district hospitals (DHs)

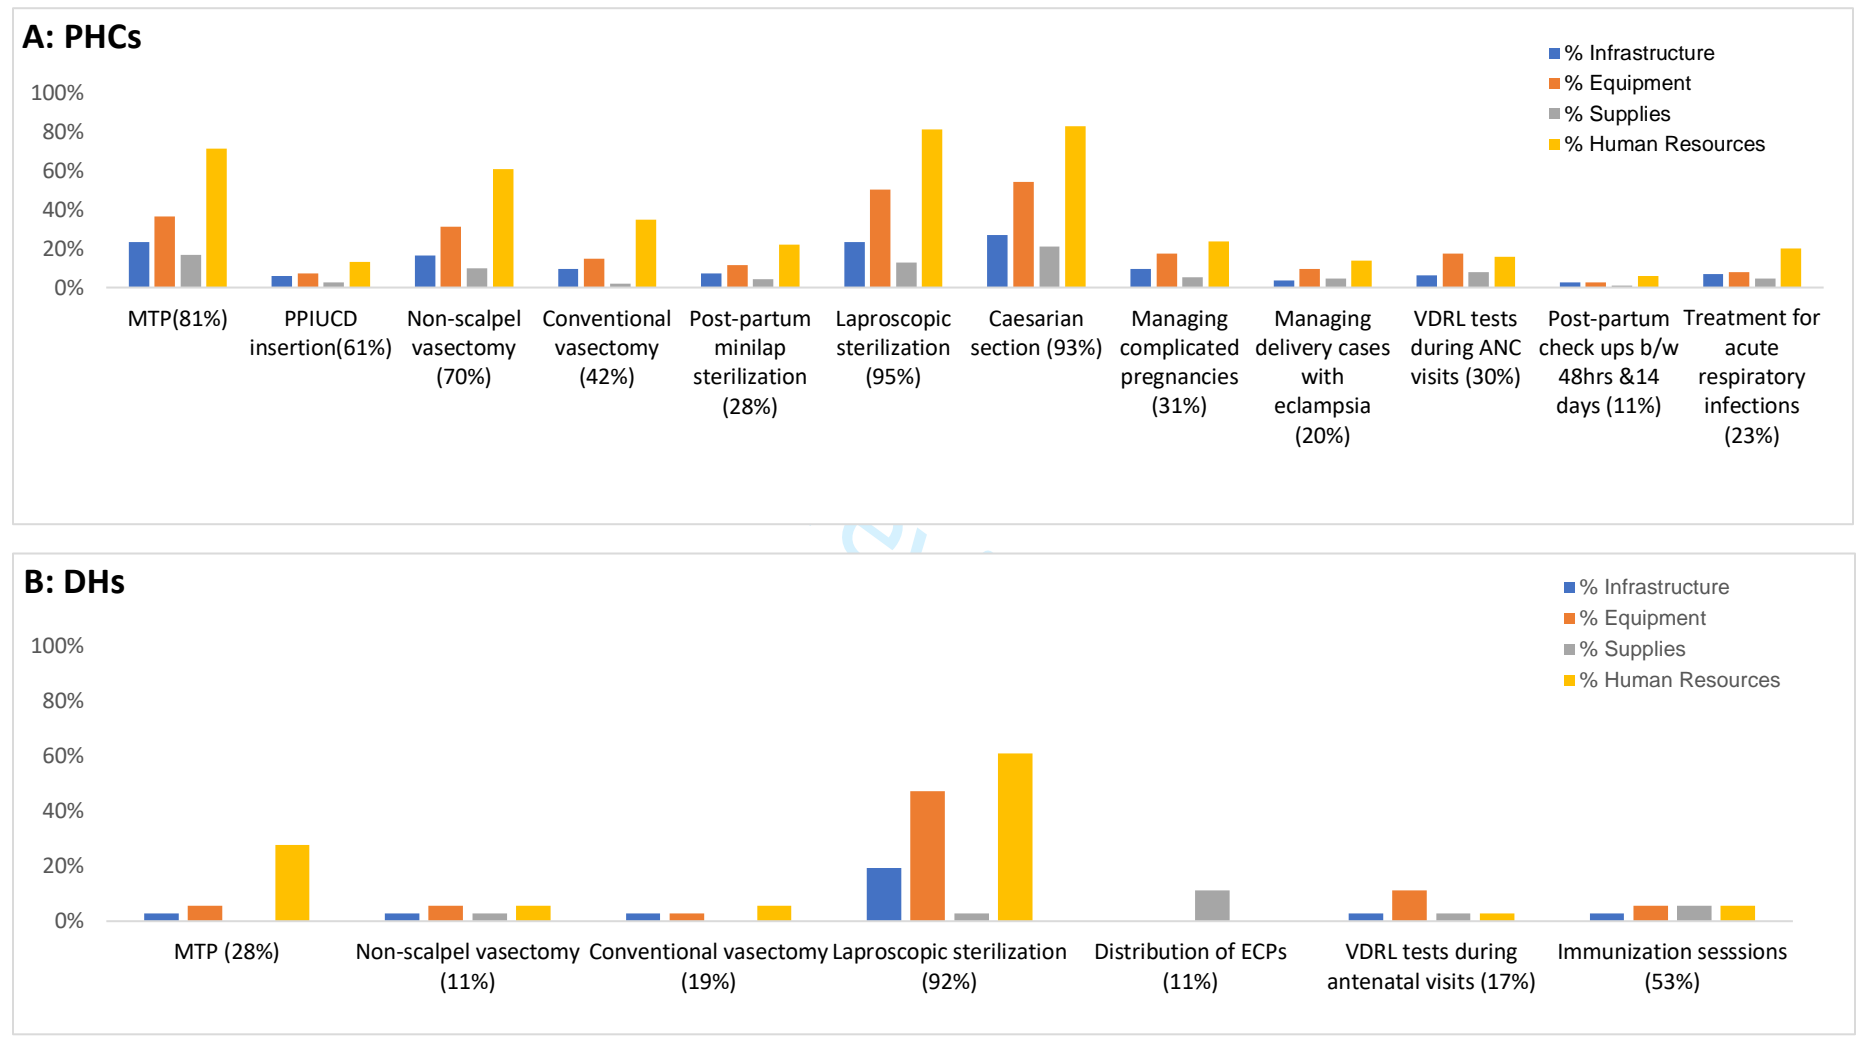

Multiple answers were allowed. Figures in parentheses of x axis report the total unavailability

Abbreviations: MTP: Medical termination of pregnancy; ECP: Emergency contraceptive pill; VDRL: Venereal Disease Research Laboratory; PPIUCD: Postpartum Intrauterine Contraceptive Device; ANC: Ante natal care

**Figure 2:** Structural readiness scores across district hospitals (DHs) and primary health centres (PHCs)

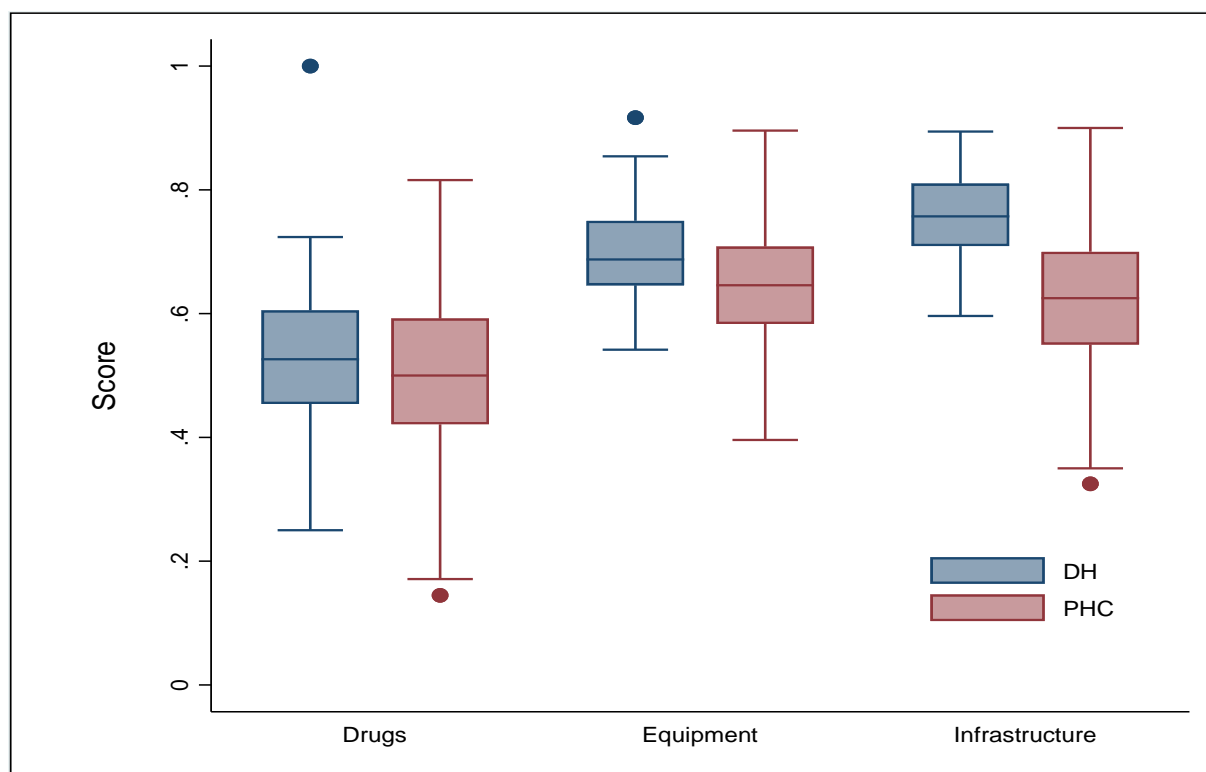

Scores are presented as box plots representing the median and interquartile range (box and whiskers, respectively) and outliers (dots).



**Figure 3:** Structural capacity, staffing and quality of care relationship for primary health centres (blue) and district hospitals (orange)

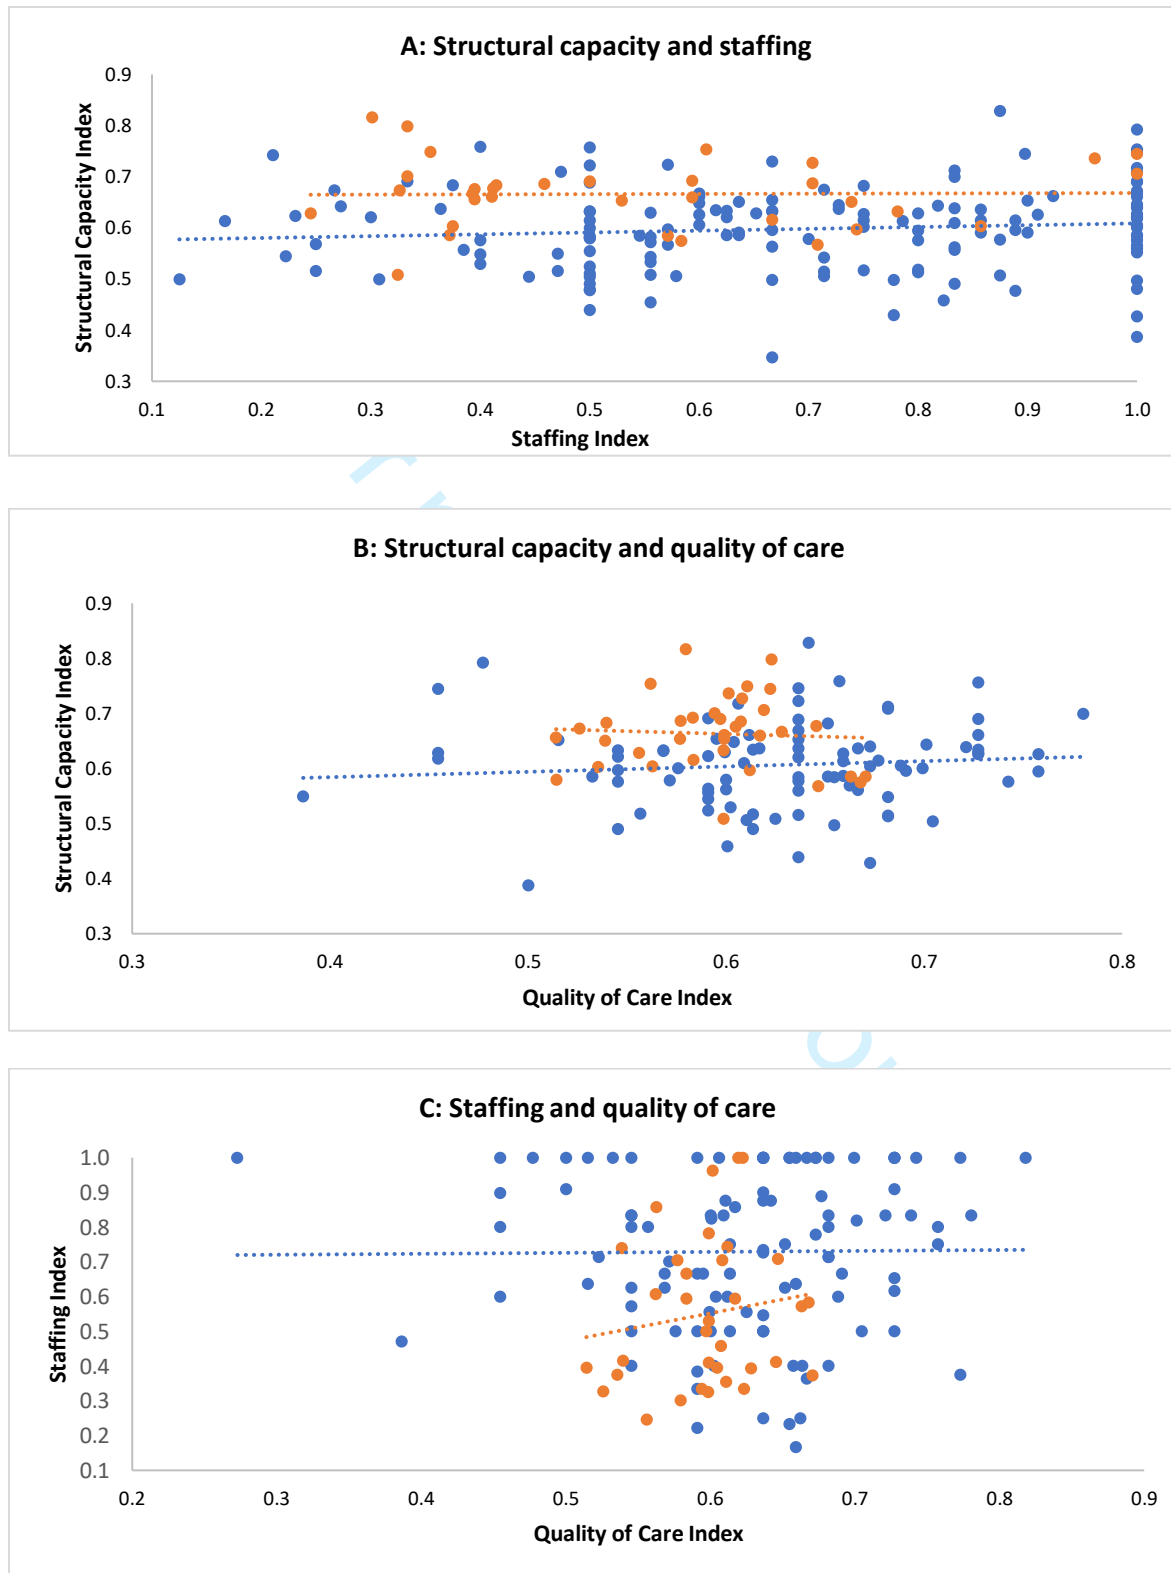

Each point represents the indexes for each facility (PHC or DH). The trend line shows the relationship between the staffing and quality of care across the PHCs (blue) and DHs (orange). Note that axis scales vary.

## APPENDIX 1

### Additional methods

#### *Infrastructure scoring*

A score out of 1 was generated for each of these components. These scores were added, giving equal weight to each component and divided by the total components to generate an overall score ranging from 0 to 1, which was then converted to a percentage by multiplying by 100.

To compute a score for the component 'power/electricity' in the facilities, a value 1 was assigned to the facilities with continuous power, 0.75 to the facilities which reported occasional disruption to power in summer only, 0.5 to the facilities that were facing occasional disruption to power throughout the year, 0.25 to facilities with regular interruption to power and 0 to the facilities that reported no power supply. In cases where back-up was available that met the entire needs of the facility the above score was replaced by 1. For the 'water' score, 0.5 was assigned for availability of 24\*7 running water and 0.5 if filtered water was available to patients. For telephone connection, a value 1 was assigned if it was available, else 0.

The transport score was computed by giving a score 0.5 to availability of at least one functional ambulance and an additional 0.5 to 24\*7 availability. For toilets, 0.5 was assigned in case a functional toilet was available and 0.25 in case a toilet was available but not functional. Another 0.5 was assigned if the condition of the toilet was good and 0.25 if it needed repair/maintenance. For handwashing stations, 1 was assigned for the availability for elbow tap with running water and 0.5 was assigned for tap (without elbow) with running water. For computer and internet, 0.5 was assigned if the hospital had provided a computer and an additional 0.5 if there was internet connection available at the facility. For blood bank, 1 was assigned if there was a blood bank provision at the hospital, else 0.

For room availability, a score of 1 was assigned for the availability of each of the 16 rooms and then, it was added across rooms and divided by 16 to get a score out of 1. The 16 rooms were waiting room, labour room, maternity ward, immunization room, counselling room, operation theatre, store room, paediatrics, labour room eclampsia, SNCU (sick new born care unit), NBSU (new born stabilization units), septic labour room, antenatal ward, postnatal ward, postpartum ward and post-operative ward.

#### *Equipment scoring*

To compute the equipment score, a value 1 was assigned to each equipment if it was available and functional, else it was assigned 0. After computing the score for each equipment, we divided it by 48 (total equipment) to get a score out of 1 and multiplied by 100 to get the percentage distribution.

#### *Supplies/drugs scoring*

The availability of a drug was assigned a value 1, else it was assigned 0. The scores for each of the drugs were added, divided by the total (76) and then multiplied by 100 to get the percentage distribution.

**Table S1:** Infrastructure assessed

| Infrastructure Components        | Facility Level |
|----------------------------------|----------------|
| Handwashing in immunization Room | PHCs, DHs      |
| Handwashing in laboratory        | PHCs, DHs      |
| Handwashing in operation theatre | PHCs, DHs      |
| Toilet in labour room            | PHCs, DHs      |
| Handwashing in labour room       | PHCs, DHs      |
| Transport                        | PHCs, DHs      |
| Water                            | PHCs, DHs      |
| Power                            | PHCs, DHs      |
| Phone                            | PHCs, DHs      |
| Room availability                | DHs            |
| Blood bank                       | DHs            |
| Computer and internet            | DHs            |

Abbreviations: PHC: Primary health centre, DH: District hospital

**Table S2:** Equipment assessed in district hospitals and primary health centres

| Equipment                      |
|--------------------------------|
| Caserean kit                   |
| Neonatal stethoscope           |
| MTP suction                    |
| Light examination              |
| NSV kit                        |
| Infantometer                   |
| Baby incubator                 |
| MTP kit                        |
| Nebulizer                      |
| Feeding tube                   |
| Shadowless lamp (OT)           |
| Conventional vasectomy kit     |
| Oxygen cylinder (LR)           |
| Minilap kit                    |
| Resuscitation kit              |
| Spotlight (OT)                 |
| Autoclave (NBCC)               |
| Stethoscope (OT)               |
| IV stand (OT)                  |
| Step up stool                  |
| Immunization table             |
| Oxygen cylinder (OT)           |
| Hub cutter (immunization room) |
| Partograph                     |
| Phototherapy unit              |

|                                 |
|---------------------------------|
| Cord clamp                      |
| Thermometer (LR)                |
| IV cannula                      |
| Hub cutter (NBCC)               |
| PPIUCD kit                      |
| Pump suction                    |
| Autoclave (OT)                  |
| Freeze tags                     |
| Stethoscope (LR)                |
| Sterile gloves                  |
| Radiant warmer                  |
| Thermometer (immunization room) |
| Delivery kit                    |
| IUCD kit                        |
| Refrigerator                    |
| Ambu bag (NBCC)                 |
| Deep freezer                    |
| Operating table                 |
| Vaccine Carrier                 |
| BP Instrument                   |
| Labour table                    |
| Baby weighing machine           |
| Ice packs                       |

*Information in parantheses represent the room in which the equipment was checked.*

Abbreviations: MTP: Medical termination of pregnancy; NSV: Non-scalpel vasectomy; OT: Operation theatre; LR: labour room; NBCC: Newborn care corner; PPIUCD: Postpartum Intrauterine Contraceptive Device; IUCD: Intra-Uterine Contraceptive Devices; BP: Blood pressure

**Table S3:** Drugs assessed in district hospitals and primary health centres

| Drugs                         |
|-------------------------------|
| Amitriptyline                 |
| Captopril                     |
| Suxamethonium bromide         |
| Mephenteramine                |
| Carboprost                    |
| Miltefosine                   |
| Syrup salbutamol              |
| Hydralazine                   |
| Omeprazole                    |
| Chlorine solution             |
| Halothane (inhalation)        |
| Menadione (Vit K3)            |
| IUCD 375                      |
| Methyldopa                    |
| Simvastatin                   |
| Amphotericin B                |
| Liposomal amphotericin B      |
| Phytonadione                  |
| Glibenclamide                 |
| Skin disinfectant             |
| Vitamin K                     |
| Thiopental (powder)           |
| Dopamine                      |
| OPV                           |
| Deriphylline                  |
| BCG                           |
| Hepatitis B                   |
| DPT                           |
| Pentavalent                   |
| Frusemide                     |
| Measles                       |
| Epinephrine                   |
| Syrup vitamin A               |
| Iron folic acid – small       |
| Atenolol                      |
| Pentazocin chloride           |
| Ceftriaxone                   |
| Methylegometrine (Methargine) |
| Nifedepine                    |
| Xylocard                      |
| Promethazine                  |
| Betamethasone                 |
| Hydrocortisone succinate      |

|    |                             |
|----|-----------------------------|
| 1  |                             |
| 2  |                             |
| 3  | Antiseptic solution         |
| 4  | Tetanus Toxoid              |
| 5  | Pheneramine maleate         |
| 6  | Adrenaline                  |
| 7  | Co-trimoxazole              |
| 8  | Injection ranitidine        |
| 9  | Zinc tablets                |
| 10 | Syrup paracetamol           |
| 11 | IUCD 380A                   |
| 12 | DEC (Diethyl Carbamazine)   |
| 13 | Iron folic acid – Large     |
| 14 | Amoxicillin                 |
| 15 | Metoclopramide              |
| 16 | OCPs (Mala-N)               |
| 17 | Ampicillin                  |
| 18 | Calcium gluconate           |
| 19 | ECPs                        |
| 20 | Lignocaine hydrochloride 2% |
| 21 | Misoprostol                 |
| 22 | Condoms (Nirodh)            |
| 23 | Ciprofloxacin               |
| 24 | Diclofenac                  |
| 25 | Magnesium sulphate          |
| 26 | Gentamycin                  |
| 27 | Atropine                    |
| 28 | Oxytocin                    |
| 29 | Albendazole                 |
| 30 | Ketamine                    |
| 31 | Diazepam                    |
| 32 | ORS                         |
| 33 | Dexamethasone               |
| 34 | Metronidazole               |
| 35 | Paracetamol                 |
| 36 |                             |
| 37 |                             |
| 38 |                             |
| 39 |                             |
| 40 |                             |
| 41 |                             |
| 42 |                             |
| 43 |                             |
| 44 |                             |
| 45 |                             |

Abbreviation: IUCD: Intra-Uterine Contraceptive Devices; BCG: Bacille Calmette Guerin; DPT: Diphtheria, Pertussis and tetanus; OPV: Oral Polio Vaccine; ORS: Oral Rehydration Solution; OCP: Oral contraceptive pill; ECP: Emergency contraceptive pill

**Table S4:** Essential and Desirable Staff Guidelines at district hospitals (DHs) and primary health centres (PHCs) as per IPHS Guidelines**A: PHCs**

| IPHS Guidelines<br>Staff | Type A    |           | Type B    |           |
|--------------------------|-----------|-----------|-----------|-----------|
|                          | Essential | Desirable | Essential | Desirable |
| Medical Officer-MBBS     | 1         |           | 1         | 1         |
| Medical Officer-AYUSH    |           | 1         |           | 1         |
| Pharmacist               | 1         |           | 1         |           |
| Nurse-midwife (ANMs)     | 3         | 1         | 4         | 1         |
| Laboratory Technician    | 1         |           | 1         |           |

Type A PHC: PHC with delivery load of less than 20 deliveries in a month and Type B PHC: PHC with delivery load of 20 or more deliveries in a month

**B: DHs**

| IPHS Requirements     | 100 Beds | 200 Beds | 300 Beds | 400 Beds | 500 Beds |
|-----------------------|----------|----------|----------|----------|----------|
| Medical officer       | 11       | 13       | 15       | 19       | 23       |
| Staff Nurse/ANMs      | 45       | 90       | 135      | 180      | 225      |
| Lab Technician        | 6        | 9        | 12       | 15       | 18       |
| Compounder/Pharmacist | 5        | 7        | 9        | 11       | 13       |
| Store Keeper          | 1        | 1        | 2        | 2        | 2        |

**Table S5:** Number of respondents at district hospitals (DHs) and primary health centres (PHCs).

| No. of respondents at     |      |  | Information covered                              |
|---------------------------|------|--|--------------------------------------------------|
| No. of respondents at DHs | PHCs |  |                                                  |
| 36                        | 190  |  | Overall Infrastructure, Staffing                 |
| 35                        | 171  |  | Laboratory: Infrastructure                       |
| 36                        | 179  |  | Labour room: Infrastructure, Equipment, Supplies |
| 35                        | 181  |  | Immunization room: Infrastructure, Equipment     |
| 36                        | 166  |  | Operation Theatre: Infrastructure, Equipment     |
| 35                        | 177  |  | Drug Store room: Supplies                        |

Note: This table shows the number of respondents that were available for each of these components. The information on sub-components could vary based on the knowledge of the respondent.

**Table S6:** Reasons for unavailability of services at district hospitals (DHs) and primary health centres (PHCs)

| Services                   | % Unavailable |      | Reasons for unavailability |      |           |      |       |      |          |      |
|----------------------------|---------------|------|----------------------------|------|-----------|------|-------|------|----------|------|
|                            | DHs           | PHCs | Infrastructure             |      | Equipment |      | Drugs |      | Supplies |      |
|                            |               |      | DHs                        | PHCs | DHs       | PHCs | DHs   | PHCs | DHs      | PHCs |
| MTP                        | 28%           | 81%  | 3%                         | 23%  | 6%        | 37%  | 0%    | 17%  | 28%      | 71%  |
| IUCD insertion             | 0%            | 3%   | 0%                         | 1%   | 0%        | 1%   | 0%    | 0%   | 0%       | 2%   |
| IUCD removal               | 0%            | 3%   | 0%                         | 1%   | 0%        | 1%   | 0%    | 0%   | 0%       | 2%   |
| Post-partum IUCD insertion | 0%            | 16%  | 0%                         | 6%   | 0%        | 7%   | 0%    | 3%   | 0%       | 13%  |
| Non-scalpel vasectomy      | 11%           | 70%  | 3%                         | 16%  | 6%        | 31%  | 3%    | 10%  | 6%       | 61%  |

|                                                       |     |     |     |     |     |     |     |     |     |     |
|-------------------------------------------------------|-----|-----|-----|-----|-----|-----|-----|-----|-----|-----|
| Conventional vasectomy                                | 19% | 42% | 3%  | 10% | 3%  | 15% | 0%  | 2%  | 6%  | 35% |
| Minilap tubectomy                                     | 3%  | 8%  | 3%  | 2%  | 0%  | 2%  | 0%  | 0%  | 3%  | 7%  |
| Post-partum minilap sterilization                     | 3%  | 28% | 0%  | 7%  | 3%  | 12% | 0%  | 4%  | 3%  | 22% |
| Laparoscopic sterilization                            | 92% | 95% | 19% | 23% | 47% | 50% | 3%  | 13% | 61% | 81% |
| Distribution of condoms                               | 6%  | 3%  | 0%  | 0%  | 0%  | 0%  | 3%  | 1%  | 0%  | 2%  |
| Distribution of OCPs                                  | 3%  | 3%  | 0%  | 0%  | 0%  | 0%  | 3%  | 1%  | 0%  | 2%  |
| Distribution of ECPs                                  | 11% | 6%  | 0%  | 1%  | 0%  | 0%  | 11% | 2%  | 0%  | 3%  |
| Normal delivery                                       | 0%  | 5%  | 0%  | 2%  | 0%  | 2%  | 0%  | 1%  | 0%  | 3%  |
| Caesarian section                                     | 3%  | -   | 3%  | -   | 3%  | -   | 0%  | -   | 0%  | -   |
| Managing complicated pregnancies                      | 0%  | 31% | 0%  | 10% | 0%  | 17% | 0%  | 5%  | 0%  | 24% |
| Managing delivery cases with eclampsia                | 8%  | 20% | 0%  | 4%  | 0%  | 10% | 0%  | 5%  | 8%  | 14% |
| Registration of pregnancies                           | 0%  | 2%  | 0%  | 0%  | 0%  | 1%  | 0%  | 0%  | 0%  | 1%  |
| Antenatal care visits                                 | 0%  | 2%  | 0%  | 0%  | 0%  | 1%  | 0%  | 0%  | 0%  | 1%  |
| Distribution of IFA tablets                           | 0%  | 5%  | 0%  | 0%  | 0%  | 1%  | 0%  | 4%  | 0%  | 1%  |
| Tetanus toxoid vaccinations                           | 3%  | 1%  | 3%  | 0%  | 0%  | 1%  | 0%  | 0%  | 0%  | 1%  |
| VDRL tests during antenatal visits                    | 17% | 30% | 3%  | 6%  | 11% | 17% | 3%  | 8%  | 3%  | 16% |
| BP tests during antenatal visits                      | 0%  | 1%  | 0%  | 0%  | 0%  | 1%  | 0%  | 0%  | 0%  | 1%  |
| HB tests during antenatal visits                      | 0%  | 8%  | 0%  | 1%  | 0%  | 5%  | 0%  | 4%  | 0%  | 5%  |
| Weighing of newborns at birth                         | 0%  | 4%  | 0%  | 2%  | 0%  | 2%  | 0%  | 1%  | 0%  | 3%  |
| Neonatal resuscitation in cases with asphyxia         | 3%  | 7%  | 3%  | 3%  | 0%  | 5%  | 0%  | 2%  | 3%  | 6%  |
| Post-partum check ups within 48hrs of delivery        | 0%  | 5%  | 0%  | 2%  | 0%  | 2%  | 0%  | 1%  | 0%  | 4%  |
| Post-partum check ups b/w 48hrs & 14 days of delivery | 0%  | 11% | 0%  | 3%  | 0%  | 3%  | 0%  | 1%  | 0%  | 6%  |
| Immunization sessions                                 | 53% | 2%  | 3%  | 0%  | 6%  | 1%  | 6%  | 0%  | 6%  | 2%  |
| Treatment for diarrhea                                | 0%  | 3%  | 0%  | 1%  | 0%  | 2%  | 0%  | 1%  | 0%  | 2%  |
| Treatment for acute respiratory infections            | 8%  | 23% | 3%  | 7%  | 3%  | 8%  | 0%  | 5%  | 3%  | 20% |

Abbreviations: MTP: Medical termination of pregnancy; IUCD: Intra-Uterine Contraceptive Devices; OCP: Oral contraceptive pill; ECP: Emergency contraceptive pill; IFA: Iron folic acid

**Table S7:** Most commonly missing and available structural capacity items across primary health centres and district hospitals



|                        | Infrastructure                         |                         | Equipment                                                     |                                                                       | Drugs                                                  |                                                                                 |
|------------------------|----------------------------------------|-------------------------|---------------------------------------------------------------|-----------------------------------------------------------------------|--------------------------------------------------------|---------------------------------------------------------------------------------|
|                        | Most commonly missing                  | Most commonly available | Most commonly missing                                         | Most commonly available                                               | Most commonly missing                                  | Most commonly available                                                         |
| Primary health centres | Handwashing in immunization room (13%) | Water (81%)             | Neonatal stethoscope (16%)                                    | Deep freezer, Ambu bag (97%)                                          | Amitriptyline (12%)                                    | ORS (95%)                                                                       |
|                        | Handwashing in laboratory (37%)        | Power (87%)             | MTP suction (17%)                                             | Operating table, labour table, BP Instrument, vaccine carrier (98%)   | Captopril (14%)                                        | Dexamethasone (99%)                                                             |
|                        | Handwashing in OT (60%)                | Phone (93%)             | Light examination (20%)                                       | Baby weighing machine, ice packs (99%)                                | Suxamethonium bromide, mephenteramine (16%)            | Paracetamol, metronidazole (100%)                                               |
| District hospitals     | Handwashing in immunization room (19%) | Water (97%)             | Infantometer, nebulizer, baby incubator (14%)                 | IV cannula, PPIUCD kit, ice packs (94%)                               | Captopril, phytanodiane, simvastin, IUCD 35 (3%)       | Atropine, DPT (94%)                                                             |
|                        | Handwashing in laboratory (47%)        | Power (99%)             | Neonatal stethoscope, MTP suction (39%)                       | Vaccine carrier, operating table, delivery kit, oxygen cylinder (97%) | Amritriptyline (6%)                                    | Dexamethasone, metronidazole, paracetamol, BCG, OPV, measles, pentavalent (97%) |
|                        | Room Availability (64%)                | Transport (100%)        | Light examination, resuscitation kit, phototherapy unit (42%) | Labour table, MTP kit, IUCD kit, Ambu bag, IV stand (100%)            | Glibenclamide, suxamethonium bromide, syrup vit A (8%) | Diazepam, tetanus toxoid (100%)                                                 |

STROBE Statement—Checklist of items that should be included in reports of *cross-sectional studies*

|                              | Item No | Recommendation                                                                                                                                                                                               | Page No |
|------------------------------|---------|--------------------------------------------------------------------------------------------------------------------------------------------------------------------------------------------------------------|---------|
| <b>Title and abstract</b>    | 1       | (a) Indicate the study's design with a commonly used term in the title or the abstract                                                                                                                       | 1       |
|                              |         | (b) Provide in the abstract an informative and balanced summary of what was done and what was found                                                                                                          | 1       |
| <b>Introduction</b>          |         |                                                                                                                                                                                                              |         |
| Background/rationale         | 2       | Explain the scientific background and rationale for the investigation being reported                                                                                                                         | 2,3     |
| Objectives                   | 3       | State specific objectives, including any prespecified hypotheses                                                                                                                                             | 3       |
| <b>Methods</b>               |         |                                                                                                                                                                                                              |         |
| Study design                 | 4       | Present key elements of study design early in the paper                                                                                                                                                      | 3       |
| Setting                      | 5       | Describe the setting, locations, and relevant dates, including periods of recruitment, exposure, follow-up, and data collection                                                                              | 3       |
| Participants                 | 6       | (a) Give the eligibility criteria, and the sources and methods of selection of participants                                                                                                                  | 4       |
| Variables                    | 7       | Clearly define all outcomes, exposures, predictors, potential confounders, and effect modifiers. Give diagnostic criteria, if applicable                                                                     | 5,6     |
| Data sources/<br>measurement | 8*      | For each variable of interest, give sources of data and details of methods of assessment (measurement). Describe comparability of assessment methods if there is more than one group                         | 4,5     |
| Bias                         | 9       | Describe any efforts to address potential sources of bias                                                                                                                                                    | 2       |
| Study size                   | 10      | Explain how the study size was arrived at                                                                                                                                                                    | 3,4     |
| Quantitative variables       | 11      | Explain how quantitative variables were handled in the analyses. If applicable, describe which groupings were chosen and why                                                                                 | 6       |
| Statistical methods          | 12      | (a) Describe all statistical methods, including those used to control for confounding                                                                                                                        | 5,6     |
|                              |         | (b) Describe any methods used to examine subgroups and interactions                                                                                                                                          | 6       |
|                              |         | (c) Explain how missing data were addressed                                                                                                                                                                  | 6       |
|                              |         | (d) If applicable, describe analytical methods taking account of sampling strategy                                                                                                                           |         |
|                              |         | (e) Describe any sensitivity analyses                                                                                                                                                                        |         |
| <b>Results</b>               |         |                                                                                                                                                                                                              |         |
| Participants                 | 13*     | (a) Report numbers of individuals at each stage of study—eg numbers potentially eligible, examined for eligibility, confirmed eligible, included in the study, completing follow-up, and analysed            | 6       |
|                              |         | (b) Give reasons for non-participation at each stage                                                                                                                                                         | 6       |
|                              |         | (c) Consider use of a flow diagram                                                                                                                                                                           |         |
| Descriptive data             | 14*     | (a) Give characteristics of study participants (eg demographic, clinical, social) and information on exposures and potential confounders                                                                     | 6,7     |
|                              |         | (b) Indicate number of participants with missing data for each variable of interest                                                                                                                          | 6       |
| Outcome data                 | 15*     | Report numbers of outcome events or summary measures                                                                                                                                                         | 6       |
| Main results                 | 16      | (a) Give unadjusted estimates and, if applicable, confounder-adjusted estimates and their precision (eg, 95% confidence interval). Make clear which confounders were adjusted for and why they were included | 7-10    |

|                          |    |                                                                                                                                                                            |       |
|--------------------------|----|----------------------------------------------------------------------------------------------------------------------------------------------------------------------------|-------|
|                          |    | (b) Report category boundaries when continuous variables were categorized                                                                                                  |       |
|                          |    | (c) If relevant, consider translating estimates of relative risk into absolute risk for a meaningful time period                                                           |       |
| Other analyses           | 17 | Report other analyses done—eg analyses of subgroups and interactions, and sensitivity analyses                                                                             | 7-10  |
| <b>Discussion</b>        |    |                                                                                                                                                                            |       |
| Key results              | 18 | Summarise key results with reference to study objectives                                                                                                                   | 11,12 |
| Limitations              | 19 | Discuss limitations of the study, taking into account sources of potential bias or imprecision. Discuss both direction and magnitude of any potential bias                 | 12    |
| Interpretation           | 20 | Give a cautious overall interpretation of results considering objectives, limitations, multiplicity of analyses, results from similar studies, and other relevant evidence | 11,12 |
| Generalisability         | 21 | Discuss the generalisability (external validity) of the study results                                                                                                      | 12    |
| <b>Other information</b> |    |                                                                                                                                                                            |       |
| Funding                  | 22 | Give the source of funding and the role of the funders for the present study and, if applicable, for the original study on which the present article is based              | 13    |

\*Give information separately for exposed and unexposed groups.

**Note:** An Explanation and Elaboration article discusses each checklist item and gives methodological background and published examples of transparent reporting. The STROBE checklist is best used in conjunction with this article (freely available on the Web sites of PLoS Medicine at <http://www.plosmedicine.org/>, Annals of Internal Medicine at <http://www.annals.org/>, and Epidemiology at <http://www.epidem.com/>). Information on the STROBE Initiative is available at [www.strobe-statement.org](http://www.strobe-statement.org).
