# Supplementary material for: Readiness of public health facilities to provide quality maternal and newborn care across the state of Bihar, India: a cross-sectional study of district hospitals and primary health centres
Source: PubMed Central journal article supplement (PMC6678016; doi:10.1136/bmjopen-2018-028370), 2019-07-29
Supplement: bmjopen-2018-028370supp001.pdf [file bmjopen-2018-028370supp001.pdf]

## **APPENDIX 1**

### **Additional methods**

#### ***Infrastructure scoring***

A score out of 1 was generated for each of these components. These scores were added, giving equal weight to each component and divided by the total components to generate an overall score ranging from 0 to 1, which was then converted to a percentage by multiplying by 100.

To compute a score for the component 'power/electricity' in the facilities, a value 1 was assigned to the facilities with continuous power, 0.75 to the facilities which reported occasional disruption to power in summer only, 0.5 to the facilities that were facing occasional disruption to power throughout the year, 0.25 to facilities with regular interruption to power and 0 to the facilities that reported no power supply. In cases where back-up was available that met the entire needs of the facility the above score was replaced by 1. For the 'water' score, 0.5 was assigned for availability of 24\*7 running water and 0.5 if filtered water was available to patients. For telephone connection, a value 1 was assigned if it was available, else 0.

The transport score was computed by giving a score 0.5 to availability of at least one functional ambulance and an additional 0.5 to 24\*7 availability. For toilets, 0.5 was assigned in case a functional toilet was available and 0.25 in case a toilet was available but not functional. Another 0.5 was assigned if the condition of the toilet was good and 0.25 if it needed repair/maintenance. For handwashing stations, 1 was assigned for the availability for elbow tap with running water and 0.5 was assigned for tap (without elbow) with running water. For computer and internet, 0.5 was assigned if the hospital had provided a computer and an additional 0.5 if there was internet connection available at the facility. For blood bank, 1 was assigned if there was a blood bank provision at the hospital, else 0.

For room availability, a score of 1 was assigned for the availability of each of the 16 rooms and then, it was added across rooms and divided by 16 to get a score out of 1. The 16 rooms were waiting room, labour room, maternity ward, immunization room, counselling room, operation theatre, store room, paediatrics, labour room eclampsia, SNCU (sick new born care unit), NBSU (new born stabilization units), septic labour room, antenatal ward, postnatal ward, postpartum ward and post-operative ward.

#### ***Equipment scoring***

To compute the equipment score, a value 1 was assigned to each equipment if it was available and functional, else it was assigned 0. After computing the score for each equipment, we divided it by 48 (total equipment) to get a score out of 1 and multiplied by 100 to get the percentage distribution.

#### ***Supplies/drugs scoring***

The availability of a drug was assigned a value 1, else it was assigned 0. The scores for each of the drugs were added, divided by the total (76) and then multiplied by 100 to get the percentage distribution.

**Table S1:** Infrastructure assessed

| Infrastructure Components        | Facility Level |
|----------------------------------|----------------|
| Handwashing in immunization Room | PHCs, DHs      |
| Handwashing in laboratory        | PHCs, DHs      |
| Handwashing in operation theatre | PHCs, DHs      |
| Toilet in labour room            | PHCs, DHs      |
| Handwashing in labour room       | PHCs, DHs      |
| Transport                        | PHCs, DHs      |
| Water                            | PHCs, DHs      |
| Power                            | PHCs, DHs      |
| Phone                            | PHCs, DHs      |
| Room availability                | DHs            |
| Blood bank                       | DHs            |
| Computer and internet            | DHs            |

Abbreviations: PHC: Primary health centre, DH: District hospital

**Table S2:** Equipment assessed in district hospitals and primary health centres

| Equipment                      |
|--------------------------------|
| Caserean kit                   |
| Neonatal stethoscope           |
| MTP suction                    |
| Light examination              |
| NSV kit                        |
| Infantometer                   |
| Baby incubator                 |
| MTP kit                        |
| Nebulizer                      |
| Feeding tube                   |
| Shadowless lamp (OT)           |
| Conventional vasectomy kit     |
| Oxygen cylinder (LR)           |
| Minilap kit                    |
| Resuscitation kit              |
| Spotlight (OT)                 |
| Autoclave (NBCC)               |
| Stethoscope (OT)               |
| IV stand (OT)                  |
| Step up stool                  |
| Immunization table             |
| Oxygen cylinder (OT)           |
| Hub cutter (immunization room) |
| Partograph                     |
| Phototherapy unit              |

|                                 |
|---------------------------------|
| Cord clamp                      |
| Thermometer (LR)                |
| IV cannula                      |
| Hub cutter (NBCC)               |
| PPIUCD kit                      |
| Pump suction                    |
| Autoclave (OT)                  |
| Freeze tags                     |
| Stethoscope (LR)                |
| Sterile gloves                  |
| Radiant warmer                  |
| Thermometer (immunization room) |
| Delivery kit                    |
| IUCD kit                        |
| Refrigerator                    |
| Ambu bag (NBCC)                 |
| Deep freezer                    |
| Operating table                 |
| Vaccine Carrier                 |
| BP Instrument                   |
| Labour table                    |
| Baby weighing machine           |
| Ice packs                       |

*Information in parantheses represent the room in which the equipment was checked.*

Abbreviations: MTP: Medical termination of pregnancy; NSV: Non-scalpel vasectomy; OT: Operation theatre; LR: labour room; NBCC: Newborn care corner; PPIUCD: Postpartum Intrauterine Contraceptive Device; IUCD: Intra-Uterine Contraceptive Devices; BP: Blood pressure

**Table S3:** Drugs assessed in district hospitals and primary health centres

| <b>Drugs</b>                  |
|-------------------------------|
| Amitriptyline                 |
| Captopril                     |
| Suxamethonium bromide         |
| Mephenteramine                |
| Carboprost                    |
| Miltefosine                   |
| Syrup salbutamol              |
| Hydralazine                   |
| Omeprazole                    |
| Chlorine solution             |
| Halothane (inhalation)        |
| Menadione (Vit K3)            |
| IUCD 375                      |
| Methyldopa                    |
| Simvastatin                   |
| Amphotericin B                |
| Liposomal amphotericin B      |
| Phytonadione                  |
| Glibenclamide                 |
| Skin disinfectant             |
| Vitamin K                     |
| Thiopental (powder)           |
| Dopamine                      |
| OPV                           |
| Deriphylline                  |
| BCG                           |
| Hepatitis B                   |
| DPT                           |
| Pentavalent                   |
| Frusemide                     |
| Measles                       |
| Epinephrine                   |
| Syrup vitamin A               |
| Iron folic acid – small       |
| Atenolol                      |
| Pentazocin chloride           |
| Ceftriaxone                   |
| Methylegometrine (Methargine) |
| Nifedepine                    |
| Xylocard                      |
| Promethazine                  |
| Betamethasone                 |
| Hydrocortisone succinate      |

|                             |
|-----------------------------|
| Antiseptic solution         |
| Tetanus Toxoid              |
| Pheneramine maleate         |
| Adrenaline                  |
| Co-trimoxazole              |
| Injection ranitidine        |
| Zinc tablets                |
| Syrup paracetamol           |
| IUCD 380A                   |
| DEC (Diethyl Carbamazine)   |
| Iron folic acid – Large     |
| Amoxicillin                 |
| Metoclopramide              |
| OCPs (Mala-N)               |
| Ampicillin                  |
| Calcium gluconate           |
| ECPs                        |
| Lignocaine hydrochloride 2% |
| Misoprostol                 |
| Condoms (Nirodh)            |
| Ciprofloxacin               |
| Diclofenac                  |
| Magnesium sulphate          |
| Gentamycin                  |
| Atropine                    |
| Oxytocin                    |
| Albendazole                 |
| Ketamine                    |
| Diazepam                    |
| ORS                         |
| Dexamethasone               |
| Metronidazole               |
| Paracetamol                 |

Abbreviation: IUCD: Intra-Uterine Contraceptive Devices; BCG: Bacille Calmette Guerin; DPT: Diphtheria, Pertussis and tetanus; OPV: Oral Polio Vaccine; ORS: Oral Rehydration Solution; OCP: Oral contraceptive pill; ECP: Emergency contraceptive pill

**Table S4:** Essential and Desirable Staff Guidelines at district hospitals (DHs) and primary health centres (PHCs) as per IPHS Guidelines

**A: PHCs**

| IPHS Guidelines<br>Staff | Type A    |           | Type B    |           |
|--------------------------|-----------|-----------|-----------|-----------|
|                          | Essential | Desirable | Essential | Desirable |
| Medical Officer-MBBS     | 1         |           | 1         | 1         |
| Medical Officer-AYUSH    |           | 1         |           | 1         |
| Pharmacist               | 1         |           | 1         |           |
| Nurse-midwife (ANMs)     | 3         | 1         | 4         | 1         |
| Laboratory Technician    | 1         |           | 1         |           |

Type A PHC: PHC with delivery load of less than 20 deliveries in a month and Type B PHC: PHC with delivery load of 20 or more deliveries in a month

**B: DHs**

| IPHS Requirements     | 100 Beds | 200 Beds | 300 Beds | 400 Beds | 500 Beds |
|-----------------------|----------|----------|----------|----------|----------|
| Medical officer       | 11       | 13       | 15       | 19       | 23       |
| Staff Nurse/ANMs      | 45       | 90       | 135      | 180      | 225      |
| Lab Technician        | 6        | 9        | 12       | 15       | 18       |
| Compounder/Pharmacist | 5        | 7        | 9        | 11       | 13       |
| Store Keeper          | 1        | 1        | 2        | 2        | 2        |

**Table S5:** Number of respondents at district hospitals (DHs) and primary health centres (PHCs).

| No. of respondents at     |      |  | Information covered                              |
|---------------------------|------|--|--------------------------------------------------|
| No. of respondents at DHs | PHCs |  |                                                  |
| 36                        | 190  |  | Overall Infrastructure, Staffing                 |
| 35                        | 171  |  | Laboratory: Infrastructure                       |
| 36                        | 179  |  | Labour room: Infrastructure, Equipment, Supplies |
| 35                        | 181  |  | Immunization room: Infrastructure, Equipment     |
| 36                        | 166  |  | Operation Theatre: Infrastructure, Equipment     |
| 35                        | 177  |  | Drug Store room: Supplies                        |

Note: This table shows the number of respondents that were available for each of these components. The information on sub-components could vary based on the knowledge of the respondent.

**Table S6:** Reasons for unavailability of services at district hospitals (DHs) and primary health centres (PHCs)

| Services                   | % Unavailable |      | Reasons for unavailability |      |           |      |       |      |          |      |
|----------------------------|---------------|------|----------------------------|------|-----------|------|-------|------|----------|------|
|                            | DHs           | PHCs | Infrastructure             |      | Equipment |      | Drugs |      | Supplies |      |
|                            |               |      | DHs                        | PHCs | DHs       | PHCs | DHs   | PHCs | DHs      | PHCs |
| MTP                        | 28%           | 81%  | 3%                         | 23%  | 6%        | 37%  | 0%    | 17%  | 28%      | 71%  |
| IUCD insertion             | 0%            | 3%   | 0%                         | 1%   | 0%        | 1%   | 0%    | 0%   | 0%       | 2%   |
| IUCD removal               | 0%            | 3%   | 0%                         | 1%   | 0%        | 1%   | 0%    | 0%   | 0%       | 2%   |
| Post-partum IUCD insertion | 0%            | 16%  | 0%                         | 6%   | 0%        | 7%   | 0%    | 3%   | 0%       | 13%  |
| Non-scalpel vasectomy      | 11%           | 70%  | 3%                         | 16%  | 6%        | 31%  | 3%    | 10%  | 6%       | 61%  |

|                                                       |     |     |     |     |     |     |     |     |     |     |
|-------------------------------------------------------|-----|-----|-----|-----|-----|-----|-----|-----|-----|-----|
| Conventional vasectomy                                | 19% | 42% | 3%  | 10% | 3%  | 15% | 0%  | 2%  | 6%  | 35% |
| Minilap tubectomy                                     | 3%  | 8%  | 3%  | 2%  | 0%  | 2%  | 0%  | 0%  | 3%  | 7%  |
| Post-partum minilap sterilization                     | 3%  | 28% | 0%  | 7%  | 3%  | 12% | 0%  | 4%  | 3%  | 22% |
| Laparoscopic sterilization                            | 92% | 95% | 19% | 23% | 47% | 50% | 3%  | 13% | 61% | 81% |
| Distribution of condoms                               | 6%  | 3%  | 0%  | 0%  | 0%  | 0%  | 3%  | 1%  | 0%  | 2%  |
| Distribution of OCPs                                  | 3%  | 3%  | 0%  | 0%  | 0%  | 0%  | 3%  | 1%  | 0%  | 2%  |
| Distribution of ECPs                                  | 11% | 6%  | 0%  | 1%  | 0%  | 0%  | 11% | 2%  | 0%  | 3%  |
| Normal delivery                                       | 0%  | 5%  | 0%  | 2%  | 0%  | 2%  | 0%  | 1%  | 0%  | 3%  |
| Caesarian section                                     | 3%  | -   | 3%  | -   | 3%  | -   | 0%  | -   | 0%  | -   |
| Managing complicated pregnancies                      | 0%  | 31% | 0%  | 10% | 0%  | 17% | 0%  | 5%  | 0%  | 24% |
| Managing delivery cases with eclampsia                | 8%  | 20% | 0%  | 4%  | 0%  | 10% | 0%  | 5%  | 8%  | 14% |
| Registration of pregnancies                           | 0%  | 2%  | 0%  | 0%  | 0%  | 1%  | 0%  | 0%  | 0%  | 1%  |
| Antenatal care visits                                 | 0%  | 2%  | 0%  | 0%  | 0%  | 1%  | 0%  | 0%  | 0%  | 1%  |
| Distribution of IFA tablets                           | 0%  | 5%  | 0%  | 0%  | 0%  | 1%  | 0%  | 4%  | 0%  | 1%  |
| Tetanus toxoid vaccinations                           | 3%  | 1%  | 3%  | 0%  | 0%  | 1%  | 0%  | 0%  | 0%  | 1%  |
| VDRL tests during antenatal visits                    | 17% | 30% | 3%  | 6%  | 11% | 17% | 3%  | 8%  | 3%  | 16% |
| BP tests during antenatal visits                      | 0%  | 1%  | 0%  | 0%  | 0%  | 1%  | 0%  | 0%  | 0%  | 1%  |
| HB tests during antenatal visits                      | 0%  | 8%  | 0%  | 1%  | 0%  | 5%  | 0%  | 4%  | 0%  | 5%  |
| Weighing of newborns at birth                         | 0%  | 4%  | 0%  | 2%  | 0%  | 2%  | 0%  | 1%  | 0%  | 3%  |
| Neonatal resuscitation in cases with asphyxia         | 3%  | 7%  | 3%  | 3%  | 0%  | 5%  | 0%  | 2%  | 3%  | 6%  |
| Post-partum check ups within 48hrs of delivery        | 0%  | 5%  | 0%  | 2%  | 0%  | 2%  | 0%  | 1%  | 0%  | 4%  |
| Post-partum check ups b/w 48hrs & 14 days of delivery | 0%  | 11% | 0%  | 3%  | 0%  | 3%  | 0%  | 1%  | 0%  | 6%  |
| Immunization sessions                                 | 53% | 2%  | 3%  | 0%  | 6%  | 1%  | 6%  | 0%  | 6%  | 2%  |
| Treatment for diarrhea                                | 0%  | 3%  | 0%  | 1%  | 0%  | 2%  | 0%  | 1%  | 0%  | 2%  |
| Treatment for acute respiratory infections            | 8%  | 23% | 3%  | 7%  | 3%  | 8%  | 0%  | 5%  | 3%  | 20% |

Abbreviations: MTP: Medical termination of pregnancy; IUCD: Intra-Uterine Contraceptive Devices; OCP: Oral contraceptive pill; ECP: Emergency contraceptive pill; IFA: Iron folic acid

**Table S7:** Most commonly missing and available structural capacity items across primary health centres and district hospitals

|                        | Infrastructure                         |                         | Equipment                                                     |                                                                       | Drugs                                                  |                                                                                 |
|------------------------|----------------------------------------|-------------------------|---------------------------------------------------------------|-----------------------------------------------------------------------|--------------------------------------------------------|---------------------------------------------------------------------------------|
|                        | Most commonly missing                  | Most commonly available | Most commonly missing                                         | Most commonly available                                               | Most commonly missing                                  | Most commonly available                                                         |
| Primary health centres | Handwashing in immunization room (13%) | Water (81%)             | Neonatal stethoscope (16%)                                    | Deep freezer, Ambu bag (97%)                                          | Amitriptyline (12%)                                    | ORS (95%)                                                                       |
|                        | Handwashing in laboratory (37%)        | Power (87%)             | MTP suction (17%)                                             | Operating table, labour table, BP Instrument, vaccine carrier (98%)   | Captopril (14%)                                        | Dexamethasone (99%)                                                             |
|                        | Handwashing in OT (60%)                | Phone (93%)             | Light examination (20%)                                       | Baby weighing machine, ice packs (99%)                                | Suxamethonium bromide, mephenteramine (16%)            | Paracetamol, metronidazole (100%)                                               |
| District hospitals     | Handwashing in immunization room (19%) | Water (97%)             | Infantometer, nebulizer, baby incubator (14%)                 | IV cannula, PPIUCD kit, ice packs (94%)                               | Captopril, phytanodiane, simvastin, IUCD 35 (3%)       | Atropine, DPT (94%)                                                             |
|                        | Handwashing in laboratory (47%)        | Power (99%)             | Neonatal stethoscope, MTP suction (39%)                       | Vaccine carrier, operating table, delivery kit, oxygen cylinder (97%) | Amritriptyline (6%)                                    | Dexamethasone, metronidazole, paracetamol, BCG, OPV, measles, pentavalent (97%) |
|                        | Room Availability (64%)                | Transport (100%)        | Light examination, resuscitation kit, phototherapy unit (42%) | Labour table, MTP kit, IUCD kit, Ambu bag, IV stand (100%)            | Glibenclamide, suxamethonium bromide, syrup vit A (8%) | Diazepam, tetanus toxoid (100%)                                                 |
